1  
2  
3  
4  
5  
6  
7  
8  
9  
10  
11  
12  
13  
14  
15  
16  
17  
18  
19  
20  
21  
22

The Rous sarcoma virus Gag polyprotein forms biomolecular condensates  
driven by intrinsically-disordered regions

Rebecca Kaddis Maldonado<sup>1</sup>, Breanna L. Rice<sup>1</sup>, Gregory S. Lambert<sup>1</sup>, Malgorzata Sudol<sup>1</sup>, John  
M. Flanagan<sup>2</sup>, and Leslie J. Parent<sup>1,3\*</sup>

<sup>1</sup>Departments of Medicine, <sup>2</sup>Biochemistry & Molecular Biology, and <sup>3</sup>Microbiology &  
Immunology,  
Penn State College of Medicine  
500 University Drive  
Hershey, PA 17033

\*Corresponding author

Email: lparent@psu.edu

23

## 24 **Abstract**

25

26 Biomolecular condensates (BMCs) play important roles in cellular structures including  
27 transcription factories, splicing speckles, and nucleoli. BMCs bring together proteins and other  
28 macromolecules, selectively concentrating them so that specific reactions can occur without  
29 interference from the surrounding environment. BMCs are often made up of proteins that  
30 contain intrinsically disordered regions (IDRs), form phase-separated spherical puncta, form  
31 liquid-like droplets that undergo fusion and fission, contain molecules that are mobile, and are  
32 disrupted with phase-dissolving drugs such as 1,6-hexanediol. In addition to cellular proteins,  
33 many viruses, including influenza A, SARS-CoV-2, and human immunodeficiency virus type 1  
34 (HIV-1) encode proteins that undergo phase separation and rely on BMC formation for  
35 replication. In prior studies of the retrovirus Rous sarcoma virus (RSV), we observed that the  
36 Gag protein forms discrete spherical puncta in the nucleus, cytoplasm, and at the plasma  
37 membrane that co-localize with viral RNA and host factors, raising the possibility that RSV Gag  
38 forms BMCs that participate in the virion intracellular assembly pathway. In our current studies,  
39 we found that Gag contains IDRs in the N-terminal (MAp2p10) and C-terminal (NC) regions of  
40 the protein and fulfills many criteria of BMCs. Although the role of BMC formation in RSV  
41 assembly requires further study, our results suggest the biophysical properties of condensates  
42 are required for the formation of Gag complexes in the nucleus and the cohesion of these  
43 complexes as they traffic through the nuclear pore, into the cytoplasm, and to the plasma  
44 membrane, where the final assembly and release of virus particles occurs.

45

## 46 **Introduction**

47 Rous sarcoma virus (RSV), an avian oncoretrovirus discovered by Peyton Rous in 1910 [1-  
48 4], was the first virus found to cause solid tumors [1, 5, 6]. The RSV Gag polyprotein, which  
49 orchestrates the assembly of nascent virions, has served for decades as the basis for dissecting  
50 the modular assembly domains involved in virus particle biogenesis [7-14]. Gag is synthesized as

51 a multidomain precursor that is proteolytically cleaved after budding by the C-terminal protease  
52 (PR) domain into the mature matrix (MA), p2, p10, capsid (CA), and nucleocapsid (NC) that make  
53 up the virion core (reviewed in [15]). Based on the observation that virus particles are released  
54 from the plasma membrane, it was generally accepted that RSV Gag functioned exclusively in  
55 the cytoplasm. However, using genetic, biochemical, and advanced imaging approaches, we  
56 discovered that RSV Gag undergoes transient nucleocytoplasmic trafficking. This process is  
57 mediated by intrinsic nuclear localization signals (NLS) in MA and NC, and a nuclear export signal  
58 (NES) in p10 that interacts with the CRM1-RanGTP export complex to exit through the nuclear  
59 envelope [16-23].

60 To examine the mechanisms underlying RSV Gag subcellular trafficking, we have studied the  
61 localization of wild-type and mutant Gag proteins fused to fluorescent tags [16-19, 22-24], in both  
62 living and fixed cells. These imaging experiments revealed that Gag forms discrete foci in the  
63 nucleus, cytoplasm, and at the plasma membrane ([4]; Fig 1). Electron micrographs have failed  
64 to demonstrate that there are membranes surrounding these intracellular Gag foci (unpublished  
65 data), raising the possibility that Gag forms well-defined, focal puncta using similar mechanisms  
66 to those that govern the formation of membraneless organelles--also known as biomolecular  
67 condensates (BMCs) [3, 22, 25-34]—in nuclear and cytoplasmic compartments, which  
68 accumulate along the plasma membrane for release from the cell. <sup>1</sup>

69 To organize cellular activities into discrete compartments that are not membrane-enclosed,  
70 macromolecules can form densely packed, discrete complexes known as BMCs [34, 35]. As the  
71 protein concentration in these complexes reaches a critical threshold, de-mixing occurs and  
72 liquid-like droplets form, physically separating themselves from the surrounding milieu and

---

<sup>1</sup> Abbreviations: BMCs, Biomolecular condensates; RSV, Rous sarcoma virus; MA, matrix; CA, capsid; NC, nucleocapsid; PR, protease; IDRs, intrinsically disordered regions; vRNP, viral ribonucleoprotein complex; HIV-1; human immunodeficiency virus type 1; LMB, leptomycin B; NLS, nuclear localization signal; NES, nuclear export signal; DIC, differential interference contrast; FRAP, fluorescence recovery after photobleaching; NTD, N-terminal domain

73 adopting properties of a liquid [27, 34-37]. Phase separation is driven by multivalent protein-  
74 protein and protein-nucleic acid interactions consisting of electrostatic and hydrophobic forces  
75 [27, 28, 31, 33-36, 38-46]. These interactions may be mediated by intrinsically disordered  
76 regions (IDRs) or low complexity motifs that become ordered when bound to RNA [40, 44, 45,  
77 47] or other biomolecules. Cytoplasmic examples of BMCs include stress granules and P bodies  
78 [48, 49], and nucleoli, Cajal bodies, and transcriptional condensates have been described as  
79 nuclear BMCs [50]. Nuclear processes that are driven by concentrating critical molecules in  
80 BMCs include transcription, splicing, DNA repair, and chromatin modification [44, 50-52]. If  
81 phase transition states become dysregulated and progress from liquid to solid, pathological gels  
82 and fibrils can form, resulting in disease states [31, 53, 54].

83 Numerous viruses have been reported to use phase separation as a mechanism to facilitate  
84 virus replication. For example, measles, rabies, influenza, vesicular stomatitis virus, and  
85 adenovirus viral ribonucleoprotein (vRNP) replication complexes utilize LLPS as a mechanism  
86 to concentrate viral components within cells [55-61]. Among retroviruses, human  
87 immunodeficiency virus type 1 (HIV-1) Gag has been shown to form BMCs, with the NC protein  
88 appearing to be a major driver of condensate formation [62]. Based on computational  
89 predictions indicating that RSV Gag contains IDRs, and in light of the observation that RSV Gag  
90 forms foci in different subcellular compartments, we tested the hypothesis that RSV Gag  
91 possess biophysical properties of liquid-like, phase-separated BMCs. Our experimental results  
92 suggest that Gag is finely tuned to form BMCs with differing characteristics during the assembly  
93 pathway from the nucleus to the plasma membrane. Further evidence for the importance of  
94 phase transitions in RSV biology stem from our observations that the biophysical properties of  
95 RSV Gag are sensitive to concentration and to mutations that lead to alterations in the liquid-like  
96 properties of the protein.

## 97 **Results**

98 **RSV Gag contains IDRs and forms phase-contrasted nuclear foci.** We previously observed  
99 that RSV Gag forms spherical foci in the nucleus, cytoplasm, and at the plasma membrane,  
100 representing each of the subcellular compartments involved the assembly pathway [3, 22].  
101 Approximately 20% of wild-type RSV Gag localizes to the nucleus under steady-state conditions  
102 [17, 20], and interfering with CRM1-mediated nuclear export by mutating the p10 NES (e.g.,  
103 mutant Gag.L219A), treating cells with leptomycin B (LMB), or overexpressing dominant-  
104 negative mutants of nucleoporins Nup98 or Nup214, causes nuclear Gag foci to accumulate in  
105 size and number [17, 19]. The spherical appearance of Gag foci, as well as the observation that  
106 they are enhanced with increased concentration, suggested that these protein-rich foci could  
107 form BMCs, as described for other viral and cellular complexes. Others have noted that RSV  
108 Gag contains unstructured domains [63], and the presence of IDRs has been described in the  
109 HIV-1 Gag protein [62]. To examine more specifically whether the RSV Gag polyprotein  
110 contains canonical IDRs, we used PONDR (Predictor of Natural Disordered Regions;  
111 [www.pondr.com](http://www.pondr.com)) to analyze the amino acid sequence (Fig. 1A). We identified two prominent  
112 IDRs: one encompassing the C-terminal portion of MA plus the adjacent p2 and p10 domains;  
113 and the other extending throughout the NC domain.

114 To determine whether nuclear foci formed by wild-type or mutant Gag proteins form phase-  
115 contrasted complexes--as described for other IDR-containing proteins (reviewed in [64])—we  
116 performed confocal fluorescence microscopy and differential interference contrast (DIC) imaging  
117 (Fig. 1B-E). The wild-type Gag protein forms foci in the cytoplasm, at the plasma membrane,  
118 and in the nucleus (outlined in white) as previously reported (Fig. 1B, Gag-SNAPTag fusion  
119 protein, green), with nuclear foci demonstrating phase contrast overlapping with the fluorescent  
120 signal of the protein (Fig. 1B; arrows). Treatment of cells with LMB or co-expression of a  
121 dominant-negative Nup214 protein (NP214-DsRed, red) resulted in accumulation of numerous  
122 nuclear Gag-SNAPTag foci that exhibited phase contrast (Fig. 1C and D, respectively) [19]. The  
123 p10 NES mutant Gag.L219A-CFP also formed prominent nuclear complexes that corresponded

124 to phase-contrasted foci in the DIC images. As noted previously, Gag nuclear foci appear larger  
125 and more numerous when nucleocytoplasmic transport is inhibited, either by expression of a  
126 dominant-negative NP214, treatment with LMB, or mutation of the p10 NES, indicating that the  
127 formation of Gag nuclear foci is concentration-dependent, a characteristic of BMCs [19].  
128 Together, these data suggest that Gag meets two criteria of BMCs: the presence of IDRs and  
129 the ability to form spherical foci that are visible under DIC imaging.

130 **Recombinant Gag proteins form phase-contrasted droplets *in vitro*.** Another characteristic  
131 of proteins that form BMCs is their ability to form liquid-like droplets *in vitro* that demonstrate  
132 separation from the surrounding milieu [27, 34-36]. To determine whether RSV Gag proteins  
133 were capable of forming phase-separated droplets *in vitro*, recombinant full-length Gag. $\Delta$ PR  
134 (WT Gag), Gag.L219A, and Gag deletion mutants were highly purified from *E. coli* in the  
135 absence of nucleic acids, labeled with Alexa 488, and mixed with a crowding agent to a final  
136 protein concentration of 5  $\mu$ M, 10  $\mu$ M, or 20  $\mu$ M (Fig. 2). Under all conditions, full-length  
137 Gag. $\Delta$ PR (WT, Fig. 2A) formed droplets that demonstrated phase-contrast by DIC. Based on  
138 the prediction that IDRs were located in the MAp2p10 and NC domains of Gag (Figure 1A), we  
139 examined various truncation mutants to determine whether they possessed the ability to form *in*  
140 *vitro* droplets. Although each construct was capable of forming droplets *in vitro*, the number and  
141 size of droplets varied considerably among the purified proteins.

142 To quantitate the differences in size and number at each concentration, low magnification  
143 (1x) fluorescence images of each construct were analyzed using the spot function in the Imaris  
144 imaging analysis program (Fig. 2 and 3; Supplemental Tables 1 and 2). For NC and CA, which  
145 lack abundant primary amines for labeling (see Methods) making their fluorescence difficult to  
146 visualize, DIC images were used rather than fluorescence images. Only spherical droplets were  
147 counted to avoid skewing the measured diameter of the droplets. WT Gag formed droplets that  
148 exhibited a concentration-dependent increase in size ( $p < 0.0001$  for each concentration), with 10

149  $\mu\text{M}$  yielding the highest number of droplets ( $p < 0.001$  compared to  $5 \mu\text{M}$  and  $p = 0.0047$   
150 compared to  $20 \mu\text{M}$ ). The observed decrease in droplet number at a concentration of  $20 \mu\text{M}$   
151 could be due to nucleation of smaller droplets into less abundant, larger droplets.

152 The largest predicted IDR in Gag was in MAp2p10, so we deleted this region to determine  
153 whether it was necessary for the formation of *in vitro* droplets (CANC, Figure 2B). Compared to  
154 WT Gag, CANC formed significantly fewer and smaller spherical droplets (number vs WT:  
155  $p < 0.0001$  for all concentrations; size vs WT:  $5 \mu\text{M}$   $p = 0.0009$ ,  $10 \mu\text{M}$  and  $20 \mu\text{M}$   $p < 0.0001$ ),  
156 suggesting that MAp2p10 contributes to the efficiency of *in vitro* droplet formation. The other  
157 IDR is predicted to be located in the NC domain (Figure 1A), so we next deleted this region from  
158 Gag and assessed droplet number and size. Deletion of NC led to the formation of droplets that  
159 were larger at  $5 \mu\text{M}$  and  $20 \mu\text{M}$  concentrations, yet smaller for  $10 \mu\text{M}$  compared to WT Gag at  
160 the same concentrations ( $p < 0.0001$  for all concentrations).

161 To further determine the sufficiency of individual Gag domains to form droplets, we  
162 performed the same *in vitro* droplet assay using segments of Gag. We first examined whether  
163 MA alone was capable of forming droplets, as it contains only a small portion of the IDR (Figure  
164 2D). The size of MA droplets was similar at  $5 \mu\text{M}$ , larger at  $10 \mu\text{M}$ , but smaller at  $20 \mu\text{M}$   
165 compared to WT Gag at the same concentrations ( $p < 0.0001$  at  $10$  and  $20 \mu\text{M}$  concentrations).  
166 However, the number of droplets formed by MA was greatly decreased compared to WT Gag  
167 ( $< 100$  droplets per field) and did not vary with differing protein concentration, suggesting that  
168 MA alone does not efficiently undergo LLPS to form droplets; alternatively, the observed  
169 complexes could be formed by other types of interactions. Although we wished to examine the  
170 propensity of MAp2p10 to form droplets, it was insoluble when extracted from *E. coli* (data not  
171 shown), possibly due to its disorder. However, by adding the structured N-terminal domain of  
172 CA (NTD), the protein was well-behaved. MAp2p10-NTD efficiently formed droplets that  
173 increased in size with increasing protein concentration and were significantly larger than WT at  
174 the corresponding protein concentrations ( $p < 0.0001$  at all concentrations). Although MAp2p10-

175 NTD formed fewer droplets than WT Gag, the difference was only significant at 10  $\mu$ M  
176 ( $p < 0.0001$ ), again suggesting that MAp2p10 plays a major role in Gag's ability to undergo phase  
177 separation. The slightly decreased droplet count of MAp2p10-NTD compared to WT Gag  
178 suggests that the NC domain IDR also contributes to Gag droplet formation in the context of full  
179 length Gag. Although NC alone produced fewer and smaller droplets at each protein  
180 concentration compared to WT Gag, it made more droplets compared to MA alone, suggesting  
181 that NC is sufficient to form BMCs and likely contributes to Gag droplet formation *in vitro*.

182 CA does not contain an IDR, but contains structured N- and C-terminal domains and plays  
183 an important role in the formation of the viral capsid in mature virions [63]. Therefore, we set out  
184 to determine whether it is capable of forming phase-separated droplets in our *in vitro* assay.  
185 Under these conditions, CA produced droplets very inefficiently, with the lowest number of  
186 complexes formed of all constructs tested. Interestingly, the number of CA complexes did not  
187 increase with increasing protein concentration. These results suggest that CA does not form  
188 BMCs, but instead is consistent with previous findings indicating that CA forms a stable ordered  
189 complex required for capsid structure in the mature virion [65].

190 Based on our observation in cells that mutating the Gag p10 NES (Gag.L219A) results in  
191 large nuclear foci suggestive of BMCs [19], we asked whether Gag.L219A forms droplets *in vitro*  
192 (Figure 2H). To our surprise, droplet size for this protein increased significantly as protein  
193 concentration increased ( $p < 0.0001$  at all concentrations). However, the number of droplets was  
194 not significantly different among each protein concentration and was similar to WT Gag at all  
195 concentrations except 10  $\mu$ M. At this concentration, Gag.L219A formed fewer droplets  
196 compared to WT Gag ( $p < 0.0001$ ), suggesting that this mutation in the p10 sequence within the  
197 IDR does have a minor effect on *in vitro* droplet formation.

198 To define the phase diagram for WT Gag, the protein and salt (NaCl) concentrations were  
199 varied (Figure 3C). Assays were conducted in the range of protein concentrations from 5-75  $\mu$ M  
200 and NaCl concentrations varying from 50-300 mM using unlabeled purified WT Gag protein and



201 imaged using DIC. Droplets were imaged at low magnification and the average number of  
202 droplets in  $\geq 5$  fields were counted using the Imaris spot function. In the heat map, white  
203 indicates zero droplets with increasing intensity of blue color showing more droplets with a  
204 maximum of dark blue, which contained over 500 droplets. As expected for a protein undergoing  
205 phase separation, Gag droplet formation was sensitive to protein and salt concentration. Gag  
206 did not form droplets efficiently at the lowest concentrations of protein and NaCl (5  $\mu\text{M}$ , 50 mM,  
207 respectively); droplet formation peaked at mid-range concentrations of 10-40  $\mu\text{M}$  and 150 mM  
208 NaCl; and fewer particles formed at the highest protein concentrations tested ( $>40 \mu\text{M}$ ). For WT  
209 Gag, 150 mM appeared to be the ideal salt concentration for most protein concentrations, with  
210 10-20  $\mu\text{M}$  being the optimal protein concentration.

211 **Gag droplets undergo fusion and fission, demonstrating liquid-like properties.** To  
212 determine whether Gag droplets formed *in vitro* were dynamic (Figure 4), 20  $\mu\text{M}$  of unlabeled  
213 WT Gag or Gag.L219A protein was used in an *in vitro* droplet assay and imaged directly after  
214 mixing and for every 10 seconds for a defined period under brightfield for WT Gag (Figure 4A;  
215 Supplemental Movie 1, black circle) or DIC for the p10 NES mutant Gag.L219A (Figure 4B;  
216 Supplemental Movie 2, black circles). For both proteins, fusion between two droplets (white  
217 arrows) occurred over time.

218 To examine fusion and fission *in vivo*, living QT6 cells expressing Gag-SNAPTag were  
219 imaged at 1 frame/minute (Figure 5A, plus Supplemental Movies 3a, 3b, and c). For better  
220 visualization of the foci in each cellular compartment, a separate movie was generated with the  
221 histogram differently adjusted for the nucleus (Supplemental Movie 3a), cytoplasm  
222 (Supplemental Movie 3b), and plasma membrane (Supplemental Movie 3c). In the first frame  
223 shown in Fig. 5A ( $t = 2 \text{ min}$ ), two individual separate nuclear foci are indicated by white arrows  
224 (nucleus outlined in dashed white line; see also zoomed in image of boxed region below and  
225 Supplemental Movie 3a, puncta enclosed in white circle). At the next time point ( $t = 3 \text{ min}$ ) the  
226 individual nuclear puncta fused into a single focus. Throughout the still images and

227 supplemental movies of this cell, several foci were observed undergoing fusion and fission in  
228 the cytoplasm (yellow arrows shown in main image and in boxed area zoomed in below; yellow  
229 circles in Supplemental Movie 3b) and at the plasma membrane (magenta arrows in main image  
230 and in boxed area zoomed in below; magenta circle in Supplemental Movie 3c), indicating that  
231 Gag foci are dynamic in all major subcellular compartments. To examine the dynamic properties  
232 of the nuclear-localized Gag.L219A-YFP NES mutant, time-lapse live cell imaging was  
233 performed under similar conditions (Figure 5B; Supplemental Movie 4, black circles). We  
234 observed several fusion events between nuclear foci which were separate at the beginning of  
235 the imaging sequence and subsequently fused into single foci after 2 min (white arrows). Taken  
236 together, these data demonstrate that WT Gag and Gag.L219A exhibit liquid-like properties,  
237 evidenced by the formation of spherical droplets that undergo fusion and fission *in vitro* and *in*  
238 *vivo*.

### 239 **Measuring protein dynamics using fluorescence recovery after photobleaching (FRAP).**

240 To determine whether Gag proteins located in spherical foci exchange freely with molecules in  
241 the surrounding environment, we performed FRAP experiments of Gag-YFP foci in the nucleus,  
242 cytoplasm, and along the plasma membrane (Fig. 6), as previously described [22]. For these  
243 experiments, the entire focus was bleached irreversibly and fluorescence was monitored to  
244 determine the half-time of recovery ( $t_{1/2}$ ) and the mobile fraction. Foci from numerous cells  
245 (range 14-23) were sampled and the means for each value were calculated (Figure 7D and E,  
246 Tables 1-4). For WT Gag foci in the nucleus, the half-time of recovery was rapid ( $1.25 \pm 0.22$   
247 seconds) and the mobile fraction was  $25 \pm 2$  %. Gag foci in the cytoplasm had a slightly longer  
248  $t_{1/2}$  of recovery ( $1.33 \pm 0.13$  seconds) and a significantly higher mobile fraction ( $33 \pm 2.9$ %,  
249  $*p=0.0473$ ). For Gag foci located at the plasma membrane, the  $t_{1/2}$  was very similar to the  
250 cytoplasmic foci at  $1.34 \pm 0.14$  seconds, and the mobile fraction  $26 \pm 2.9$ %. These data suggest  
251 that Gag foci exchange rapidly—but only to a moderate degree with surrounding molecules in  
252 all three locations—with nuclear and plasma-membrane localized Gag molecules appearing to

253 be more fixed in the complex, potentially due to their interaction with a particular set of host  
254 factors involved in their transport or localization.

255 We next assessed the effect of inhibiting WT Gag nuclear export on its exchangeability by  
256 co-expressing the trans-dominant NP214 mutant (Figure 7B), which resulted in an increase in  
257 the number and size of Gag nuclear foci. In these FRAP experiments, the  $t_{1/2} = 1.0 \pm 0.10$ ,  
258 indicating that the protein was more dynamic, and the mobile fraction was higher at  $45 \pm 2\%$   
259 (compared with: WT Gag-YFP Nuc, \*\*\*\* $p < 0.0001$ ; WT Gag-YFP Cyto. \*\*  $p = 0.0093$ ; WT Gag-  
260 YFP PM, \*\*\*\* $p < 0.0001$ ). By comparison, the Gag nuclear export mutant (Gag.L219A; Figure  
261 7C) had the largest nuclear foci, the highest mobile fraction ( $69 \pm 2\%$ , \*\*\*\* $p < 0.0001$  compared  
262 to all conditions), and the most rapid exchange kinetics with  $t_{1/2} = 0.91 \pm 0.10$  seconds  
263 (Compared to WT Gag-YFP Cyto, \* $p = 0.0149$ ; WT Gag-YFP PM, \* $p = 0.0190$ ). In both cases,  
264 increasing the intranuclear concentration of Gag resulted in more dynamic behavior of the  
265 protein, suggesting it adopted more liquid-like behavior in a concentration-dependent manner.  
266 As a control, we expressed PSP1 protein (Figure 7A), which is known to form BMCs as a  
267 component of paraspeckles [66]. This protein had a  $t_{1/2}$  of  $4.49 \pm 0.24$  seconds and mobile  
268 fraction of  $45 \pm 1\%$  in QT6 cells. This  $t_{1/2}$  for PSP1 was in the same range as that of a previously  
269 reported value (6.42 seconds), although the mobile fraction we measured was decreased [67],  
270 likely due to differences in cell type and in endogenous vs transient expression.

### 271 **RSV Gag IDRs contribute to condensate formation in optoDroplets**

272 To determine which regions of the RSV Gag protein contribute to condensate formation  
273 using an *in vivo* IDR assay in HEK293T cells, we generated constructs consisting of mCherry-  
274 tagged proteins derived from RSV Gag (RSV Gag  $\Delta$ PR, M<sub>Ap</sub>2p10, CA, and NC) fused to the  
275 photoactivatable domain of the CRY2 protein from *Arabidopsis thaliana* [68-71]. The  
276 optoDroplet system leverages the blue light-activated clustering of CRY2 to assess the  
277 propensity of protein sequences to form BMCs, as evidenced by real-time droplet formation  
278 observed via live cell confocal microscopy (68-71).

279 As a baseline, CRY2oligo-mCherry alone had minimal clustering when activated by blue  
280 light (Figure 8A, Supplemental Movie 5). As reported previously, the FUS.IDR caused marked  
281 clustering of CRY2oligo when stimulated using blue light (Figure 8B, Supplemental Movie 6)  
282 [69]. Of the RSV Gag proteins linked to CRY2oligo-mCherry, RSV Gag  $\Delta$ PR, MAp2p10, and NC  
283 all exhibited clustering with foci formation upon blue light exposure (Figures 8C-E, Supplemental  
284 Movies 7-9). In the absence of activation, RSV Gag  $\Delta$ PR.CRY2oligo-mCherry and  
285 MAp2p10.CRY2oligo-mCherry appeared to be diffuse, but upon blue light exposure, these two  
286 proteins formed discrete foci at the perimeter of the cells, associated with the plasma membrane  
287 (Figures 8C and D, Supplemental Movies 7 and 8). This localization pattern was consistent with  
288 the plasma membrane-binding and targeting properties of the Gag MA domain [72]. The  
289 NC.CRY2oligo-mCherry protein was diffuse in the nucleus in the absence of activation, and  
290 once stimulated with blue light, it formed numerous, discrete foci in the nucleoplasm (Figure 8E,  
291 Supplemental Movie 9). In contrast, CA, which does not contain a predicted IDR, failed to  
292 induce condensation of CRY2oligo (Figure 8F, Supplemental Movie 10). These results suggest  
293 that the IDRs in both MAp2p10 and NC are sufficient to drive to BMC formation in a cell-based  
294 assay.

295 **Exchangeability of canonical IDRs from FUS and HNRNPA1 with RSV Gag IDRs restored**  
296 **condensate formation in cells.** The data presented thus far suggest that RSV Gag undergoes  
297 LLPS to form BMCs that are primarily driven by IDRs in MAp2p10 and NC. To test whether  
298 classically defined IDRs from two well-studied proteins, FUS and HNRNPA1, could replace the  
299 IDRs in Gag, we produced chimeric proteins for a set of gain-of-function experiments in QT6  
300 cells (Figure 9). In the absence of the NC domain, Gag was distributed throughout the  
301 cytoplasm due to the loss of the nuclear localization signal [16, 17], and the deletion mutant fails  
302 to form foci as reported previously [17], including at the plasma membrane (compare Figures 1B  
303 and 9A). Substitution of the FUS IDR for the NC sequence in Gag restored formation of foci in  
304 the nucleus, cytoplasm, and at the plasma membrane (Figure 9B), demonstrating that the

305 presence of an IDR in the NC region is sufficient to recreate the typical pattern of Gag  
306 distribution.

307 To determine whether this effect was specific for the FUS IDR, we used the IDR from  
308 HNRNPA1 as the donor. Replacing NC with the HNRNPA1 IDR resulted in an increase in the  
309 nuclear localization of Gag, and foci were formed primarily along the plasma membrane (Figure  
310 9C). These data suggest that both the FUS and HNRNPA1 IDRs can functionally replace the  
311 NC sequence to restore the formation of Gag foci.

312 As a next step, we examined whether the Gag IDRs in MAp2p10 and NC could replace the  
313 FUS and HNRNPA1 IDRs. The full-length FUS-YFP protein forms foci in the nucleus and  
314 cytoplasm in QT6 cells, but is primarily nuclear in HeLa cells [73], suggesting a cell type  
315 difference (data not shown). When the FUS IDR was deleted, the protein was cytoplasmic and  
316 formed large aggregates rather than discrete foci (Figure 9D). The replacement of NC for the  
317 FUS IDR resulted in formation of discrete cytoplasmic and nuclear foci (Figure 9E). The  
318 substitution of the MAp2p10 IDR sequence for the FUS IDR led to plasma membrane-localized  
319 foci, like that of full-length Gag protein (compare Figure 1B with 9F). Deletion of the HNRNPA1  
320 IDR caused the protein to localize in a diffuse pattern throughout the cell (Figure 9G). Replacing  
321 the HNRNPA1 IDR with NC or MAp2p10 restored formation of discrete foci in the cytoplasm and  
322 at the plasma membrane for both chimeric proteins (Figures 9H and 9I, respectively).

323 **Sensitivity of Gag BMCs to 1,6-Hexanediol *In vitro* and *In vivo*.** Traditionally the aliphatic  
324 alcohol 1,6'-hexanediol has been used to study phase-contrasted BMCs because it dissolves  
325 droplets by disrupting weak hydrophobic protein-protein interactions [74]. For example,  
326 condensates formed by several nuclear proteins have been shown to be disrupted by 1,6'-  
327 hexanediol [75-79]. To determine whether RSV Gag foci would be disrupted by 1,6'-hexanediol,  
328 QT6 cells expressing WT Gag or nuclear-restricted Gag were treated with 10% 1,6'-hexanediol  
329 for 1 minute, and the paraspeckle protein NONO was used as a control (Figure 10A, panel a).  
330 With 1,6'-hexanediol treatment, a majority of NONO foci were disrupted, as expected, although

331 some nuclear foci remained intact under these conditions, indicating that the global cellular  
332 architecture was not destroyed by drug treatment. When cells expressing WT Gag were treated  
333 with 1,6'-hexanediol, foci completely dissolved, and Gag became diffuse throughout the cell  
334 (panel b). Similarly, nuclear Gag foci formed by co-expression of NP214 dissolved with 1,6'-  
335 hexanediol treatment (panel c). The nuclear foci formed by Gag.L219A were mostly dissolved  
336 with 1,6'-hexanediol treatment, although some foci remained visible in the nucleus and along  
337 the plasma membrane (panel d). Although 1,6'-hexanediol is toxic and has nonspecific effects  
338 [74, 80], it should be noted that not all foci were dissolved, particularly for NONO, and cells  
339 remained intact during the short treatment period.

340 Next, we asked whether treatment with 10% 1,6'-hexanediol disrupted the formation of  
341 droplets *in vitro* (Figure 10B-D). Droplets were assembled using the method described in Figure  
342 2, 10% 1,6-hexanediol was added for 10 minutes, and images were analyzed using the Imaris  
343 spot function. Droplets formed by WT Gag and MAp2p10-NTD were counted using the  
344 fluorescence channel and the DIC images were used for NC quantification. To better visualize  
345 the NC droplets for display purposes, the droplets were overlaid with the magenta spots in  
346 Imaris and enlarged (Figure 10B). Treatment with 1,6'-hexanediol had a significant effect on  
347 droplets for all three proteins, with a reduction in the number and size of the droplets formed by  
348 the isolated IDRs, MAp2p10 and NC. Interestingly, there was a paradoxical effect of 1,6'-  
349 hexanediol treatment on WT Gag droplets, which became larger and more numerous. The  
350 reason for this unexpected result could be due to effects other than weak hydrophobic forces  
351 holding the WT Gag complexes together *in vitro*. The different effect of hexanediol on *in vivo*  
352 and *in vitro* full-length Gag droplets could also be due to the drug's effect on other cellular  
353 factors such as RNA, proteins, or lipids interacting with Gag.

## 354 **Discussion**

355 It has been increasingly appreciated that BMCs play an important role the replication of  
356 many viruses, including influenza, SARS-CoV-2, HIV-1, and others, as reviewed elsewhere [81-

357 84]. In our previous work, we observed the *in vivo* formation of RSV Gag foci in the nucleus,  
358 cytoplasm, and plasma membrane that colocalize with unspliced viral RNA and splicing factors  
359 [3, 4, 23]. Furthermore, we have observed that the Gag nuclear foci are dynamic and not merely  
360 aggregates [3, 22]. Based on the new data presented here, the RSV Gag polyprotein meets  
361 several criteria for BMCs that undergo LLPS [33, 34, 39, 50, 75, 85, 86], based on *in vivo* and *in*  
362 *vitro* assays. These properties include formation of foci that can be visualized using DIC  
363 microscopy (Fig. 1B-E); droplets with liquid-like properties that undergo fusion and fission in  
364 cells and *in vitro* (Figs. 4 and 5); complexes that exchange rapidly with the molecules in the  
365 surrounding environment, with a short half-time of recovery and prominent mobile fraction (Figs.  
366 6 and 7; Tables 1-4); and disruption of foci upon treatment of cells with 1,6'-hexanediol (Fig. 10)  
367 [74, 87].

368 Viral and cellular proteins that undergo condensate formation typically contain IDRs that  
369 regulate affinity or specificity of binding and may also function as nucleic acid binding domains  
370 [88-90]. We identified two IDRs in Gag, one in the N-terminal region encompassing MAp2p10  
371 and the other in the C-terminal NC domain. Both IDR sequences are sufficient to form BMCs *in*  
372 *vitro*, although MAp2p10 appears to play a more prominent role in Gag droplet formation.  
373 Arguably, the most compelling evidence for their ability to provide the driving force in BMC  
374 formation is their ability to substitute functionally for the IDRs of FUS and HNRNPA1, and their  
375 ability to undergo location-specific condensation in optoDroplet assays. In addition, the need for  
376 an IDR function in Gag to properly form BMCs and direct it to the proper subcellular  
377 compartments is supported by the exchangeability of the FUS and HNRNPA1 IDRs for the NC  
378 IDR in Gag.

379 Interestingly, the Gag IDRs are located in regions that interact with cellular factors during the  
380 assembly process: MA contains an NLS that binds the karyopherins importin-11 and TNPO3  
381 [16, 91]; p2 contains the late assembly domain [12] that binds to ESCRT proteins [92] and the  
382 NEDD4 ubiquitin ligase [93]; p10 contains an NES that interacts with the host export factor

383 CRM1 [17, 24]; and NC contains a nuclear import signal that binds directly to importin-alpha to  
384 recruit importin-beta [16-19]. Additionally, MA has nonspecific nucleic binding activity, whereas  
385 NC possesses high affinity for the psi packaging sequence [2, 94-97]. We have previously  
386 shown that the Gag NC domain is required for the formation of nuclear Gag foci, suggesting that  
387 condensate formation depends on intermolecular protein-protein interactions and RNA binding  
388 [23]. Therefore, it is possible that the IDRs in RSV Gag play important functions in binding to  
389 host and viral factors that mediate transport of Gag from the nucleus to the plasma membrane  
390 during the process of creating virions. It has been proposed that IDRs adopt an ensemble of  
391 orientations that allow for promiscuous interactions with a variety of binding partners [98-102].  
392 Many viral proteins contain IDRs that are used to hijack cellular processes [103, 104], including  
393 nucleocytoplasmic transport [105], which can help to explain how the MA region binds two  
394 different nuclear import factors, nucleic acids, and then serves as a plasma membrane-binding  
395 domain by interacting with acidic phospholipids [2, 106]. The same principle applies to the IDR  
396 in NC, which binds importin-alpha for nuclear import, interacts with nucleic acids nonspecifically,  
397 and binds the psi packaging sequence specifically [16, 24, 96, 107-111]. Further investigation  
398 will be required to sort out the roles of MA and NC with their respective nucleic acid binding  
399 activities in the formation of BMCs, and the complex interplay of other host factors that interact  
400 with each of them through their IDRs.

401 Our studies revealed some intriguing differences in the biophysical properties of WT Gag and  
402 the nuclear export mutant Gag.L219A. Imparted by a point mutation in the p10 NES of Gag and  
403 affecting a structurally important domain [18, 63, 112], Gag.L219A appears to have more dynamic  
404 properties and exhibits more liquid-like behavior compared to WT Gag, as evidenced by frequent  
405 fusion and fission events. The Gag.L219A protein accumulates in large nuclear foci, and it is  
406 defective in nucleocytoplasmic trafficking and virus particle formation. These observations lead  
407 us to propose that controlling phase transitions of Gag complexes are crucial for proper virus  
408 assembly. The fine-tuned multivalent interactions that promote Gag-Gag interactions allow the



409 formation of compact, condensed foci that must maintain their integrity as they traffic through  
410 different compartments of the cell. However, dysregulation of these interactions can result in  
411 aberrant phase transitions [113-115], such as those induced by the L219A mutation, which blocks  
412 nuclear export, interferes with an important structural element in the polyprotein, and is defective  
413 in virus particle assembly. This idea is consistent with the concept that biological regulation of  
414 phase transition states is critical to maintaining functional condensates in cellular BMCs to prevent  
415 gels or fibrils from forming and causing disease [31, 38, 53, 54, 116-118].

416 We found it interesting that Gag foci remained similar in size and demonstrated fairly similar  
417 FRAP kinetics in the nucleus, cytoplasm, and plasma membrane. Further experiments will focus  
418 on identifying whether there are unique viral and cellular components of RSV BMCs in the  
419 nucleus, cytoplasm, and plasma membrane. Because most cellular proteins that form BMCs are  
420 located in a single subcellular compartment, RSV offers a unique opportunity to compare the  
421 biophysical properties of viral assembly complexes in different subcellular environments.

## 422 **Materials and Methods**

### 423 Plasmids

424 The plasmid pRU5.Gag.L219A-YFP, containing the RU5 RNA sequence followed by the *gag*  
425 coding region, was previously described [22]. pGag.L219A-CFP was previously described [4].  
426 pRU5.Gag-YFP was cloned by replacing the L219A site in pRU5.Gag.L219A-YFP using  
427 restriction sites *SacI* and *SpeI*. pGag.L219A-YFP and pGag  $\Delta$ NC-YFP were described  
428 previously [23]. pNP214-DsRed was described previously [19]. pYFP-PSP1alpha (referred to as  
429 YFP-PSP1 in this manuscript) was a kind gift was Dr. Angus Lamond, University of Dundee,  
430 United Kingdom [66]. pNONO-YFP (also known as p54/nrb) was previously described [3].  
431 Plasmids pRU5.Gag-FUS IDR-YFP and pRU5.Gag-HNRNPA1 IDR-YFP were created through  
432 Gibson assembly [119]. Fragment 1 for both constructs was pRU5.Gag-YFP digested with *NruI*  
433 and *Apal* to remove coding regions of CA and NC. Fragment 2 for both constructs consisted of  
434 CA coding region amplified from pRU5.Gag-YFP using primers: 5' – CAC AAG ACT GGC TGA

435 TAC GGT CAG GACC - 3' and 5' – CAT GGC CGC GGC TAT GCC TTG ATCC - 3'. For  
436 pRU5.Gag-FUS IDR-YFP, Fragment 3 consists of the *fus idr* coding region from pSNAP-FUS-  
437 IDR (a generous gift from Dr. Roy Parker, University of Colorado [118]) flanked by sequences  
438 overlapping the 3' end of *ca* and the 5' end of *yfp*, and was generated using primers: 5' – GGA  
439 TCA AGG CAT AGC CGC GGC CAT GAT GGC CTC AAA CGA TTA TAC CCA ACA AG - 3'  
440 and 5' – GAC CGG CCG GTG GAT CCC GG CAC CAC TGC TGC GGT TGT AAC CAC - 3'.  
441 For pRU5.Gag-HNRNPA1 IDR-YFP, Fragment 3 consists of the *hnrnpa1 idr* coding region from  
442 pET9d-HNRNPA1, which was a kind gift from Dr. Douglas Black (Addgene plasmid # 23026;  
443 <http://n2t.net/addgene:23026>; RRID: Addgene\_23026) flanked by sequences overlapping the 3'  
444 end of *ca* and the 5' end of *yfp*, and was generated using primers: 5' – GGA TCA AGG CAT  
445 AGC CGC GGC CATG ATG GCT AGT GCT TCA TCC AGC CAA AG - 3' and 5' – GAC CGG  
446 CCG GTG GAT CCC AA ATC TTC TGC CAC TGC CAT AGC TAC - 3'.  
447 The construct pFUS ΔIDR-YFP was created by PCR amplifying the *fus* gene from pGST-  
448 TEV-FUS (a kind gift from Dr. Aaron Gitler; Addgene plasmid # 29629;  
449 <http://n2t.net/addgene:29629>; RRID: Addgene\_29629) [120] with the addition of XhoI and  
450 BamHI sites using primers: 5' – AGA TCT CGA GGC CAC CAT GTA TGA ACC CAG AGG TCG  
451 TGG AGGT – 3' and 5' - CGG TGG ATC CAA ATA CGG CCT CTC CCT GCG ATC CTG - 3',  
452 and inserting the product into the pEYFP.N1 vector. Plasmid pFUS-MAp2p10-YFP and pFUS-  
453 NC-YFP were created by Gibson assembly using the same Fragments 1 and 2 for both  
454 constructs. Fragment 1 was pEYFP.N1 digested with Apal. Fragment 2 was amplified *fus* minus  
455 the *idr* from pGST-TEV-FUS using primers: 5' – TAT GAA CCC AGA GGT CGT GGA - 3' and 5'  
456 – GTG AAC AGC TCC TCG CCC TTG CTC AC TGA GAT ATC ACT ATAC GGC CTC TCC  
457 CTG CGA TCCT - 3', which created an overlapping region to Fragment 1. Fragment 3 was  
458 designed from pFUS-MAp2p10-YFP to create overlapping regions to Fragments 1 and 2 using  
459 primers: 5' – AGT CGA CGG TAC CGC GCC ACC ATG GAA GCC GTC ATA AAG GTG ATT  
460 TCG - 3' and 5' – TCC ACG ACC TCT GGG TTC ATA CAT GGC CAC CAC GGG CGG - 3',

461 which amplify *map2p10* from pRU5.Gag.YFP. Fragment 3 for pFUS-NC-YFP contained  
462 overlapping regions to Fragments 1 and 2 using primers: 5' – AGT CGA CGG TAC CGC GCC  
463 ACC ATG GCA GTA GTC AAT AGA GAG AGG GAT GGA CA - 3' and 5' – TCC ACG ACC  
464 TCT GGG TTC ATA CGA GAC GGC AGG TGG CTC AGG - 3', which amplify *nc* from  
465 pRU5.Gag.YFP.

466 To make pHNRNPA1 $\Delta$ IDR-YFP, Gibson assembly was used. pEYFP.N1 was digested with  
467 AgeI and EcoRI and used as Fragment 1. pHNRNPA1 $\Delta$ IDR-YFP Fragment 2 used primers 5' –  
468 TAG CGC TAC CGG ACT CAG ATC TCG AGG CCA CCA TGT CTA AGT CAG AGT CTC CTA  
469 AAG AGCC - 3' and 5' – GGT GAA CAG CTC CTC GCC CTT GCT CAC GCC GCT ACC GCC  
470 CTC TTG CTT TGA CAG GGC TTT TCT AAC - 3', which amplified *hnrnpa1* minus the *idr*  
471 sequence from pET9d-HNRNPA1.

472 Plasmids pHNRNPA1-MAp2p10-YFP and pHNRNPA1-NC-YFP were created through  
473 Gibson assembly where Fragment 1 was pEYFP.N1 digested with AgeI and EcoRI. To make  
474 pHNRNPA1-MAp2p10-YFP, Fragment 2 used primers 5' – TAG CGC TAC CGG ACT CAG ATC  
475 TCG AGG CCA CCA TGT CTA AGT CAG AGT CTC CTA AAG AGC C - 3' and 5' – ATC ACC  
476 TTT ATG ACG GCT TCC TCT TGC TTT GAC AGG GCT TTTC - 3', which amplified *hnrnpa1*  
477 minus the *idr* sequence from pET9d.HNRNPA1. Fragment 3 amplified *map2p10* from  
478 pRU5.Gag.YFP with overlapping sequences matching Fragments 2 and 3 with primers 5' – GAA  
479 AAG CCC TGT CAA AGC AAG AGG AAG CCG TCA TAA AGG TGAT - 3' and 5' – GA ACA  
480 GCT CCT CGC CCT TGC TCA CGC CGC TAC CGCC ATAA GGA GGA GGA GGA GCC GA -  
481 3'. To make pHNRNPA1-NC-YFP, Fragment 2 used primers 5' – TAG CGC TAC CGG ACT  
482 CAG ATC TCG AGG CCA CCA TGT CTA AGT CAG AGT CTC CTA AAG AGC C - 3' and 5' –  
483 GTC CAT CCC TCT CTC TAT TGA CTA CTG CCT CT TGC TTT GAC AGG GCT TTT C - 3' to  
484 amplify *hnrnpa1* minus the *idr* sequence from pET9d.HNRNPA1. Fragment 3 amplified *nc* from  
485 pRU5.Gag.YFP with overlapping sequences matching Fragments 2 and 3 with primers 5' – GAA  
486 AAG CCC TGT CAA AGC AAG AGG CAG TAG TCA ATA GAG AGA GGG ATG GAC - 3' and

487 5' – GA ACA GCT CCT CGC CCT TGC TCA CGC CGC TAC CGCC CGA GAC GGC AGG  
488 TGG CTC AGG - 3'. pGag-SNAPTag was made by digesting pGag-CFP [23] with Apal and NotI  
489 to remove the CFP, followed by PCR amplification of the SNAPTag from pSNAP-FUS-IDR [118]  
490 using primers that insert Apal and NotI sites at the 5' and 3' ends, respectively: 5' – ATC GGG  
491 GCC CGG GAT CCA CGA CAA AGA CTG CGA AAT GAA GCG CAC CACC - 3' and 5' – GCA  
492 TGC GGC CGC ATC GAT TTA ACC CAG CCC AGG CTT GCC CAG TCT - 3'.

493 The constructs encoding the Gag proteins used for purification [pET28(-His).Gag.ΔPR,  
494 pET28(-His).Gag.ΔSPΔNC, pET28(-His).MA.p2.p10.CA-NTD, pET28(-His).CA.NC, and  
495 pET28.MA) were described in [91]. pET28(-His).NC was made by digesting pET28a(-  
496 His).Gag.ΔPR with NdeI and HindIII. NC was amplified from pET28a(-His).Gag.ΔPR using  
497 appropriate primers (5'- TACG CATATG GCA GTA GTC AAT AGA GAG AGG GAT GGA CAA  
498 AC -3' and 5'- GAT CAA GCT TTT ATT ATT ACG AGA CGG CAG GTG GCT CAG G -3'), and  
499 was inserted in between the NdeI and HindIII sites in the vector following digestion. To make  
500 pET28a(-His).Gag.L219A.ΔPR, pET28a(-His).Gag.ΔPR was digested with SpeI and Scal to  
501 remove the wild-type p10, which was replaced with the mutant L219A region from  
502 pKoz.Gag.L219A.3h-YFP that was digested with the same enzymes [22]. pET24.CA was a gift  
503 from Rebecca Craven and was purified as described [121].

504 To create the constructs for the optoDroplet imaging, CRY2olig-mCherry, a gift from  
505 Chandra Tucker (Addgene plasmid # 60032; <http://n2t.net/addgene:60032> ;  
506 RRID:Addgene\_60032) [68]. To create FUS-IDR.CRY2olig-mCherry, FUS-IDR was amplified  
507 from pSNAP-FUS-IDR using primers: 5'- ACT GGC TAG CGC CAC CAT GGC CTC AAA CGA  
508 TTA TAC CCA ACA AGC -3' and 5'- CAG TCT CGA GAC CAC TGC TGC GGT TGT AAC-3',  
509 and inserted into the NheI/XhoI sites of CRY2olig-mCherry. All Gag sequences were amplified  
510 from pRU5.Gag.3h-YFP [22].CA.CRY2oligo-mCherry was created by amplifying CA with  
511 primers: 5'- ACT GGC TAG CGC CAC CAT GCC TGT AGT GAT TAA GAC AGA GGG ACC C-  
512 3' and 5'- CAG TCT CGA GCA TGG CCG CGG CTA TGC CTT G -3'. Because an XhoI site is

513 present in Gag, the XhoI site in the original construct was replaced with an MluI site using Q5  
514 site directed mutagenesis (New England Biolabs) using primers: 5'- GGA CTC AGA TAC GCG  
515 TGC CAC CAT GAA GAT GGA CAA AAA G - 3' and 5'- GGT AGC GCT AGC GGA TCT - 3'.  
516 All of the other Gag constructs were made by inserting PCR products amplified from pRU5-  
517 Gag.3h-YFP into the NheI and MluI sites of the modified CRY2olig-mCherry construct. RSV  
518 Gag.ΔPR-CRY2olig-mCherry was created by amplifying Gag.ΔPR using primers: 5'- ACT GGC  
519 TAG CGC CAC CAT GGA AGC CGT CAT AAA GGT GAT TTC G - 3' and 5'- CAG TAC GCG  
520 TCG AGA CGG CAG GTG GCT CAG -3'. MAp2p10-CRY2olig-mCherry was generated by  
521 amplifying MAp2p10 using primers: 5'- ACT GGC TAG CGC CAC CAT GGA AGC CGT CAT  
522 AAA GGT GAT TTC G - 3' and 5'- CAG TAC GCG TCA TGG CCA CCA CGG GCG G-3'. NC-  
523 CRY2oligo-mCherry was created by amplifying NC using primers: 5'- ACT GGC TAG CGC CAC  
524 CAT GGC AGT AGT CAA TAG AGA GAG GGA TGG ACA - 3' and 5'- CAG TAC GCG TCG  
525 AGA CGG CAG GTG GCT CAG -3'. Expression of these constructs in HEK293T cells was  
526 verified by Western blot alongside CRY2oligo-mCherry alone, which served as a negative  
527 control. Plasmid sequences were all confirmed by DNA sequencing (Eurofins).

#### 528 Cell Lines, Transfection, Fixation

529 Chemically transformed quail fibroblast QT6 cells [122] were maintained as described [123].  
530 HEK293T cells obtained from ATCC (CRL-3216) were grown in Dulbecco's Modified Eagle  
531 Medium (DMEM), 10% FBS, 1% sodium pyruvate, penicillin/streptomycin and fungizone at  
532 37°C. Cells were seeded onto coverslips for fixed cells or on MatTek dishes for live-cell imaging.

533 QT6 Cells were transfected via the calcium phosphate method [124] using the following  
534 amounts of the indicated plasmid: pGag-SNAPtag (500 ng), pNP214-DsRed (1 μg), pRU5.Gag-  
535 YFP (500 ng), pGag.L219A.YFP/CFP (1.5 μg), pGag ΔNC-YFP (1 μg), pYFP-PSP1 (100 ng),  
536 pNONO-YFP (100 ng), pFUS ΔIDR-YFP (500 ng), pFUS-MAp2p10-YFP (500 ng), pFUS-NC-  
537 YFP (500 ng), pHNRNPA1 ΔIDR-YFP (500 ng), pHNRNPA1-MAp2p10-YFP (500 ng),  
538 pHNRNPA1-NC-YFP (500 ng), pRU5.Gag-FUS IDR-YFP (500 ng), and pRU5.Gag-HNRNPA1

539 IDR-YFP (500 ng). Cells containing SNAPTag fusion proteins were labeled with either  
540 SNAPTag ligand JF549 or JF646 (a kind gift from Luke Lavis, Janelia Research Campus [125])  
541 and incubated for another hour at 37°C. For fixed cell experiments, cells were fixed in either  
542 3.7% paraformaldehyde (PFA) in PHEM buffer [3.6% piperazine-*N,N*-bis(2-ethanesulfonic  
543 acid) (PIPES), 1.3% HEPES, 0.76% EGTA, 0.198% MgSO<sub>4</sub>, pH 7.0) [126] for 20 minutes or  
544 3.7% formaldehyde in PBS for 10 minutes, washed with PBS, 4',6-diamidino-2-phenylindole  
545 (DAPI) stained, and mounted in either antifade reagent (Invitrogen) or ProLong Diamond (Life  
546 Technologies).

547 For visualizing Gag foci in fixed QT6 cells (Figure 1), imaging was performed using a Leica  
548 AOBS SP8 confocal microscope with a 63x/1.4 oil objective. DAPI was excited with the 405 nm  
549 UV laser at 10% laser power and detected using a photomultiplier tube detector (PMT). The  
550 following were excited with the WLL at the specified laser lines and detected with a hybrid  
551 detector (HyD): Gag-SNAPTag-JF646 at 646 nm, NP214-dsRed at 558 nm, and Gag.L219A-  
552 CFP at 470 nm. Differential interference contrast (DIC) or brightfield (BF) were excited at 488  
553 nm and detected with a PMT.

554 For live cell imaging of optoDroplets, HEK293T cells were seeded at a density of 1x10<sup>6</sup>  
555 cells/dish in 35-mm glass-bottom dishes (MatTek) and were allowed to grow to ~80%  
556 confluency. Cells were then transfected for ~16 hours with 0.5 µg of DNA, using jetOptimus  
557 transfection reagent (Polyplus). Dishes were placed in a dark incubator post-transfection and  
558 were protected from blue light exposure from this point onwards. One hour prior to imaging, the  
559 live cell chamber was prepared and allowed to equilibrate to 37°C/5% CO<sub>2</sub>; 30 mins prior to  
560 imaging, media was removed from the MatTek dishes and replaced with Imaging Media  
561 (Fluorobrite DMEM High Glucose, without glutamine (Gibco) + 10% FBS + 1% sodium  
562 pyruvate). A Leica SP8 FALCON microscope equipped with an incubated stage at 37°C/5%  
563 CO<sub>2</sub> was used to collect images. Cells were imaged in the mCherry channel (584 nm) at 5  
564 second intervals for ~30 seconds, then were exposed to blue light (488 nm; 0.02% laser power)

565 and images were captured at 5 second intervals for 300 seconds. All live cell imaging was  
566 performed using a 63X/1.2 water objective at 3X magnification. Images and timelapse videos  
567 were prepared using Imaris software.

#### 568 Leptomycin B (LMB) Treatment

569 QT6 cells were transfected with pGag-SNAPTag for 14 hours, then 1 mL of QT6 medium  
570 containing 10 ng/mL LMB was added and incubation continued for 1 hour at 37°C. The medium  
571 was swapped for 1 mL of QT6 medium containing 10 ng/mL LMB and 1 µM SNAPTag ligand  
572 JF646 (a kind gift from Luke Lavis, Janelia Research Campus [125]) and incubated for another  
573 hour for a total treatment time of 2 hours. Cells were then fixed in 3.7% formaldehyde in PBS for  
574 10 minutes, washed with PBS, DAPI stained, and mounted with ProLong Diamond (Life  
575 Technologies) before being imaged on a Leica AOBS SP8 confocal microscope with a 63x/1.4  
576 oil objective. DAPI was excited with the 405 nm UV laser at 10% laser power and detected  
577 using a photomultiplier tube detector (PMT), and JF646 was excited using a white light laser  
578 (WLL) with a laser line excitation of 646 nm and detected using a HyD.

#### 579 In Vitro Droplet Formation

580 Recombinant RSV WT and mutant Gag proteins were expressed from pET28 (-His) vector in *E.*  
581 *coli* BL21(DE3) pRIL cells, purified through a HPLC SEC-MALS column, and stored in standard  
582 buffer (300 to 500 mM NaCl, 10 mM HEPES, pH 7.5, 0.1 mM EDTA; 0.1 mM TCEP; 0.01 mM  
583 ZnCl<sub>2</sub>). Nucleic acid contamination was assessed by measuring absorbance at 280 nm and 260  
584 nm, with ratios indicating the absence of nucleic acid contamination, as described previously  
585 [24]. Purified proteins were labelled using the Alexa Fluor 488 Microscale Protein Labeling Kit  
586 (Thermo Fisher Scientific, #A30006) according to manufacturer's protocol. Labelled protein was  
587 incubated with unlabeled protein (at a ratio of either 1:10 or 50:50) [127] to reach a final  
588 concentration of 5, 10, or 20 µM in buffer containing 20 mM HEPES, pH 7.5-8.0, 150-250 mM  
589 NaCl, and 86-150 mg/ml Ficoll-400 (used as a crowding agent), modified from: [62].  
590 Immediately after mixing, 6-10 µl of the protein solution was put on a coverslip and a slide was

591 placed on top. Coverslips were sealed with clear nail polish, then imaged after 10 minutes using  
592 the Leica AOBS SP8 confocal microscope with a 63x/1.4 oil objective. TA WLL laser line  
593 excitation of 493 nm was used in conjunction with a hybrid detector to detect the 488 fluorescent  
594 label, and DIC was used to get phase contrasted images of the droplets.

595 Droplet numbers and sizes were obtained from low magnification images using the Imaris  
596 spot function, and only spherical single droplets were counted. Prior to analysis, background  
597 was removed using a Gaussian filter. For all conditions, the fluorescence channel was used to  
598 count droplets except in the case of NC and CA. Of note, proteins were fluorescently labelled  
599 with Alexa Fluor 488 (see above) by binding to primary amines, of which NC and CA have only  
600 7 and 9, respectively.

601 Statistics were determined by one-way ANOVA using GraphPad Prism (GraphPad Software,  
602 Inc.). The phase diagram of WT Gag (RSV Gag ΔPR) was determined using the following  
603 method. Ficoll-400 was dissolved to yield a final concentration of 10% w/v in a solution  
604 containing 20 mM HEPES-OH, pH 7.5, and varying NaCl concentration (as indicated) and Gag  
605 protein was added with gentle mixing. Immediately, 6 μl was deposited on an 18 mm square  
606 glass coverslip and a slide was placed on top of the coverslip. Slides were incubated at room  
607 temperature for 5 minutes, then sealed with clear nail polish and placed in a laminar flow hood  
608 to dry for an additional 5 minutes. A Nikon CSU-X1 Spinning Disk Field Scanning Confocal  
609 microscope was utilized to collect images of 10 fields per condition at 100X magnification.  
610 Condensate number was quantified in Imaris (Bitplane) using the spot function, and heat map  
611 generated using GraphPad Prism (GraphPad Software, Inc.).

#### 612 Live Cell Imaging

613 Living cells, expressing either Gag-SNAPTag or Gag.L219A-YFP, were imaged on a Leica  
614 AOBS SP8 confocal microscope with a 63x/1.2 water objective and a live cell chamber at 37°C  
615 with 5% CO<sub>2</sub>. QT6 cells expressing Gag.SNAPTag were labelled with 100 nM of Janelia Fluor  
616 549 (JF549) ligand [125] in imaging media [clear Dulbecco's Modified Eagle Medium (DMEM)



617 with 4.0 mM L-glutamine and 4.5 mg/liter glucose (Hyclone), supplemented with 5% fetal bovine  
618 serum, 9% tryptose phosphate broth, and 1% chicken serum] for 1 hour at 37°C. Media was  
619 exchanged with fresh imaging media and then the cells were imaged for 15 minutes, with one  
620 frame imaged every minute. Cells expressing Gag.L219A-YFP were imaged for 16 minutes at  
621 one frame per minute. YFP was imaged using the WLL with a laser line excitation of 514 nm  
622 using a hybrid detector.

623 For time lapse imaging of Gag droplet fusion *in vitro*, solutions containing either unlabeled  
624 20 µM Gag.ΔPR or Gag.L219A were mixed with crowding agent as described above, added to  
625 a coverslip, covered with a slide, sealed with nail polish, and imaged using BF or DIC  
626 microscopy using a WLL at 488 nm, and detected using a PMT, capturing a frame every 10  
627 seconds.

#### 628 Fluorescence Recovery After Photobleaching (FRAP)

629 QT6 cells were seeded on glass-bottom 35 mm dishes (MatTek Corporation) and incubated  
630 overnight to allow them to adhere. The following day, cells were transfected for 16 hours, and  
631 the media was exchanged with imaging media. Cells were imaged using the FRAP module on  
632 the Leica AOBs SP8 confocal microscope 63x/1.2 water objective at 7.5x zoom with the pinhole  
633 set to 2 airy units. Three ROIs were selected: (1) the focus to be bleached, (2) the entire  
634 nucleus/cell to monitor and correct for whole cell bleaching, (3) outside of the cell for  
635 background subtraction. Ten frames were imaged of pre-bleached cells every 0.08 seconds  
636 using the Argon laser line at 514 nm set to 2% power. The laser was used at 100% power to  
637 bleach samples, for 15 frames every 0.08 seconds. Post-bleach recovery was imaged with laser  
638 line at 514 nm and 2% power over different iterations: 30 frames with 1 frame every 0.076  
639 seconds, then 15 frames imaged every 1 second, and finally, more frames every 5 seconds. For  
640 analysis purposes, later timepoints were excluded for some samples such that all conditions  
641 had the same number of timepoints (end times ranged from 18 seconds to 35 seconds). Foci  
642 were bleached to at least 40% of the starting fluorescence intensity. To calculate the mobile

643 fractions for each time point, the web application easyFRAP-web  
644 (<https://easyfrap.vmenet.upatras.gr>) was used [128]. Data was full scale normalized. GraphPad  
645 Prism 5 (GraphPad Software, Inc.) was used to generate plots of the mobile fractions over time.

#### 646 Transfections of Plasmids Expressing Gag-FUS and Gag-HNRNPA1 Chimeras

647 Following a 16-hour transfection, QT6 cells were fixed using 3.7% formaldehyde in PBS,  
648 washed with PBS, DAPI stained, and mounted in Prolong Diamond (Invitrogen). Slides were  
649 imaged on Leica AOBS SP8 confocal microscope with a 63x/1.4 oil objective. DAPI was excited  
650 with the 405 nm UV laser at 10% laser power using a PMT, and YFP imaged using the WLL  
651 with a laser line excitation of 514 nm using a hybrid detector.

#### 652 1,6'-Hexanediol Treatment

653 Before seeding, coverslips were treated with a 2% w/v gelatin solution (DIFCO). The 2%  
654 solution was first autoclaved for 30 minutes. Coverslips were washed in 70% ethanol and  
655 allowed to dry. The coverslips were incubated in the gelatin solution for at least 10 seconds then  
656 propped up and allowed to dry for at least 2 hours. Following a 16-hour transfection, QT6 cells  
657 were either left untreated or were treated with 10% w/v 1,6'-hexanediol (Tokyo Chemical  
658 Industry Company, LTD) in media for 1 minute. Cells were then immediately fixed using 3.7%  
659 paraformaldehyde (PFA) in PHEM buffer (see above) for 20 minutes, washed with PBS, (DAPI)  
660 stained, and mounted in antifade reagent (Invitrogen). Slides were imaged on Leica AOBS SP8  
661 confocal microscope with a 63x/1.4 oil objective. DAPI was excited with the 405 nm UV laser at  
662 20% laser power using a PMT, and YFP was imaged using the WLL with a laser line excitation  
663 of 514 nm using a hybrid detector. DsRed was imaged using the WLL with a laser line excitation  
664 of 558 nm using a hybrid detector.

665 For hexanediol treatment of *in vitro* droplets, 50% w/v hexanediol was added to a final  
666 concentration of 10%, incubated with 5  $\mu$ M of each Gag protein for 10 minutes, and imaged as  
667 previously described. Droplet numbers and sizes were obtained from low magnification images  
668 using the Imaris spot function as described above. Statistical analysis was performed to

669 compare treated and untreated samples using an unpaired student's t-test in GraphPad Prism  
670 (GraphPad Software, Inc.).

## 671 **Acknowledgements**

672 We would like to acknowledge those who aided in this work. We are grateful for Angus  
673 Lamond (University of Dundee), Roy Parker (University of Colorado Boulder), and Rebecca  
674 Craven (Penn State College of Medicine), who generously provided plasmids. Luke Lavis (HHMI  
675 Janelia Research Campus) kindly provided the SNAPTag JF549 and JF646 ligands. We thank  
676 Alan Cochrane (University of Toronto), Andrew Mouland (McGill University), and Jordan Chang  
677 (Penn State College of Medicine) for critical discussions. This work was supported by a grant from  
678 the National Institutes of Health, R01 GM139392 (L.J.P.) and a Summer Bridge Award from the  
679 Penn State College of Medicine (L.J.P).

680 Microscopy images and were generated and processed in the Penn State College of Medicine  
681 Advanced Light Microscopy Core (RRID: SCR\_022526). The Advanced Light Microscopy Core  
682 services and instruments used in this project were funded, in part, by the Pennsylvania State  
683 University College of Medicine via the Office of the Vice Dean of Research and Graduate Students  
684 and the Pennsylvania Department of Health using Tobacco Settlement Funds (CURE). The  
685 content is solely the responsibility of the authors and does not necessarily represent the views of  
686 the University or College of Medicine. The Pennsylvania Department of Health specifically  
687 disclaims responsibility for any analyses, interpretations or conclusions.

## 688 **References**

- 689  
690 [1] Rous P. A Transmissible Avian Neoplasm. (Sarcoma of the Common Fowl.). J Exp Med.  
691 1910;12:696-705.
- 692 [2] Parent LJ, Gudleski N. Beyond plasma membrane targeting: role of the MA domain of Gag in  
693 retroviral genome encapsidation. J Mol Biol. 2011;410:553-64.
- 694 [3] Rice B, Kaddis R, Stake M, Lochmann T, Parent L. Interplay between the alpharetroviral Gag  
695 protein and SR Proteins SF2 and SC35 in the nucleus. Frontiers in Microbiology. 2015;6.

- 696 [4] Maldonado RJK, Rice B, Chen EC, Tuffy KM, Chiari EF, Fahrbach KM, et al. Visualizing  
697 Association of the Retroviral Gag Protein with Unspliced Viral RNA in the Nucleus. *mBio*.  
698 2020;11.
- 699 [5] Rous P. A Sarcoma of the Fowl Transmissible by an Agent Separable from the Tumor Cells.  
700 *J Exp Med*. 1911;13:397-411.
- 701 [6] Rous P. An Experimental Comparison of Transplanted Tumor and a Transplanted Normal  
702 Tissue Capable of Growth. *J Exp Med*. 1910;12:344-66.
- 703 [7] Bennett RP, Nelle TD, Wills JW. Functional chimeras of the Rous sarcoma virus and human  
704 immunodeficiency virus gag proteins. *J Virol*. 1993;67:6487-98.
- 705 [8] Parent LJ, Bennett RP, Craven RC, Nelle TD, Krishna NK, Bowzard JB, et al. Positionally  
706 independent and exchangeable late budding functions of the Rous sarcoma virus and human  
707 immunodeficiency virus Gag proteins. *J Virol*. 1995;69:5455-60.
- 708 [9] Bowzard JB, Bennett RP, Krishna NK, Ernst SM, Rein A, Wills JW. Importance of basic  
709 residues in the nucleocapsid sequence for retrovirus Gag assembly and complementation  
710 rescue. *J Virol*. 1998;72:9034-44.
- 711 [10] Garnier L, Wills JW, Verderame MF, Sudol M. WW domains and retrovirus budding. *Nature*.  
712 1996;381:744-5.
- 713 [11] Patnaik A, Chau V, Wills JW. Ubiquitin is part of the retrovirus budding machinery. *Proc*  
714 *Natl Acad Sci U S A*. 2000;97:13069-74.
- 715 [12] Wills JW, Cameron CE, Wilson CB, Xiang Y, Bennett RP, Leis J. An assembly domain of  
716 the Rous sarcoma virus Gag protein required late in budding. *J Virol*. 1994;68:6605-18.
- 717 [13] Wills JW, Craven RC, Weldon RA, Jr., Nelle TD, Erdie CR. Suppression of retroviral MA  
718 deletions by the amino-terminal membrane-binding domain of p60src. *J Virol*. 1991;65:3804-12.
- 719 [14] Weldon RA, Jr., Wills JW. Characterization of a small (25-kilodalton) derivative of the Rous  
720 sarcoma virus Gag protein competent for particle release. *J Virol*. 1993;67:5550-61.

- 721 [15] Wills JW, Craven RC. Form, function, and use of retroviral gag proteins. *AIDS*. 1991;5:639-  
722 54.
- 723 [16] Butterfield-Gerson KL, Scheifele LZ, Ryan EP, Hopper AK, Parent LJ. Importin-beta family  
724 members mediate alpharetrovirus gag nuclear entry via interactions with matrix and  
725 nucleocapsid. *J Virol*. 2006;80:1798-806.
- 726 [17] Scheifele LZ, Garbitt RA, Rhoads JD, Parent LJ. Nuclear entry and CRM1-dependent  
727 nuclear export of the Rous sarcoma virus Gag polyprotein. *Proc Natl Acad Sci U S A*.  
728 2002;99:3944-9.
- 729 [18] Scheifele LZ, Kenney SP, Cairns TM, Craven RC, Parent LJ. Overlapping roles of the Rous  
730 sarcoma virus Gag p10 domain in nuclear export and virion core morphology. *J Virol*.  
731 2007;81:10718-28.
- 732 [19] Scheifele LZ, Ryan EP, Parent LJ. Detailed mapping of the nuclear export signal in the  
733 Rous sarcoma virus Gag protein. *J Virol*. 2005;79:8732-41.
- 734 [20] Garbitt-Hirst R, Kenney SP, Parent LJ. Genetic evidence for a connection between Rous  
735 sarcoma virus gag nuclear trafficking and genomic RNA packaging. *J Virol*. 2009;83:6790-7.
- 736 [21] Garbitt RA, Albert JA, Kessler MD, Parent LJ. trans-acting inhibition of genomic RNA  
737 dimerization by Rous sarcoma virus matrix mutants. *J Virol*. 2001;75:260-8.
- 738 [22] Lochmann TL, Bann DV, Ryan EP, Beyer AR, Mao A, Cochrane A, et al. NC-mediated  
739 nucleolar localization of retroviral gag proteins. *Virus Res*. 2013;171:304-18.
- 740 [23] Kenney SP, Lochmann TL, Schmid CL, Parent LJ. Intermolecular interactions between  
741 retroviral Gag proteins in the nucleus. *J Virol*. 2008;82:683-91.
- 742 [24] Gudleski N, Flanagan JM, Ryan EP, Bewley MC, Parent LJ. Directionality of  
743 nucleocytoplasmic transport of the retroviral gag protein depends on sequential binding of  
744 karyopherins and viral RNA. *Proc Natl Acad Sci U S A*. 2010;107:9358-63.
- 745 [25] Stake MS, Bann DV, Kaddis RJ, Parent LJ. Nuclear trafficking of retroviral RNAs and Gag  
746 proteins during late steps of replication. *Viruses*. 2013;5:2767-95.

- 747 [26] Brangwynne CP, Eckmann CR, Courson DS, Rybarska A, Hoege C, Gharakhani J, et al.  
748 Germline P granules are liquid droplets that localize by controlled dissolution/condensation.  
749 Science. 2009;324:1729-32.
- 750 [27] Gomes E, Shorter J. The molecular language of membraneless organelles. J Biol Chem.  
751 2018.
- 752 [28] Li XH, Chavali PL, Pancsa R, Chavali S, Babu MM. Function and Regulation of Phase-  
753 Separated Biological Condensates. Biochemistry. 2018;57:2452-61.
- 754 [29] Guo L, Shorter J. It's Raining Liquids: RNA Tunes Viscoelasticity and Dynamics of  
755 Membraneless Organelles. Mol Cell. 2015;60:189-92.
- 756 [30] Feric M, Vaidya N, Harmon TS, Mitrea DM, Zhu L, Richardson TM, et al. Coexisting Liquid  
757 Phases Underlie Nucleolar Subcompartments. Cell. 2016;165:1686-97.
- 758 [31] Shin Y, Brangwynne CP. Liquid phase condensation in cell physiology and disease.  
759 Science. 2017;357.
- 760 [32] Taylor N, Elbaum-Garfinkle S, Vaidya N, Zhang H, Stone HA, Brangwynne CP. Biophysical  
761 characterization of organelle-based RNA/protein liquid phases using microfluidics. Soft Matter.  
762 2016;12:9142-50.
- 763 [33] Wei MT, Elbaum-Garfinkle S, Holehouse AS, Chen CC, Feric M, Arnold CB, et al. Phase  
764 behaviour of disordered proteins underlying low density and high permeability of liquid  
765 organelles. Nat Chem. 2017;9:1118-25.
- 766 [34] Boeynaems S, Alberti S, Fawzi NL, Mittag T, Polymenidou M, Rousseau F, et al. Protein  
767 Phase Separation: A New Phase in Cell Biology. Trends Cell Biol. 2018;28:420-35.
- 768 [35] Banani SF, Lee HO, Hyman AA, Rosen MK. Biomolecular condensates: organizers of  
769 cellular biochemistry. Nat Rev Mol Cell Biol. 2017;18:285-98.
- 770 [36] Alberti S. Phase separation in biology. Current Biology. 2017;27:R1097-R102.
- 771 [37] Fay MM, Anderson PJ. The Role of RNA in Biological Phase Separations. J Mol Biol.  
772 2018;430:4685-701.

- 773 [38] Banani SF, Rice AM, Peeples WB, Lin Y, Jain S, Parker R, et al. Compositional Control of  
774 Phase-Separated Cellular Bodies. *Cell*. 2016;166:651-63.
- 775 [39] Brangwynne CP. Phase transitions and size scaling of membrane-less organelles. *J Cell*  
776 *Biol*. 2013;203:875-81.
- 777 [40] Fonin AV, Darling AL, Kuznetsova IM, Turoverov KK, Uversky VN. Intrinsically disordered  
778 proteins in crowded milieu: when chaos prevails within the cellular gumbo. *Cell Mol Life Sci*.  
779 2018;75:3907-29.
- 780 [41] Mitrea DM, Kriwacki RW. Phase separation in biology; functional organization of a higher  
781 order. *Cell Commun Signal*. 2016;14:1.
- 782 [42] Sawyer IA, Sturgill D, Dundr M. Membraneless nuclear organelles and the search for  
783 phases within phases. *Wiley interdisciplinary reviews RNA*. 2018:e1514.
- 784 [43] Stroberg W, Schnell S. On the origin of non-membrane-bound organelles, and their  
785 physiological function. *Journal of theoretical biology*. 2017;434:42-9.
- 786 [44] Uversky VN. Intrinsically disordered proteins in overcrowded milieu: Membrane-less  
787 organelles, phase separation, and intrinsic disorder. *Curr Opin Struct Biol*. 2017;44:18-30.
- 788 [45] Wang J, Choi JM, Holehouse AS, Lee HO, Zhang X, Jahnel M, et al. A Molecular Grammar  
789 Governing the Driving Forces for Phase Separation of Prion-like RNA Binding Proteins. *Cell*.  
790 2018;174:688-99 e16.
- 791 [46] Wheeler RJ, Hyman AA. Controlling compartmentalization by non-membrane-bound  
792 organelles. *Philos Trans R Soc Lond B Biol Sci*. 2018;373.
- 793 [47] Uversky VN. Proteins without unique 3D structures: biotechnological applications of  
794 intrinsically unstable/disordered proteins. *Biotechnology journal*. 2015;10:356-66.
- 795 [48] Hubstenberger A, Courel M, Benard M, Souquere S, Ernoult-Lange M, Chouaib R, et al. P-  
796 Body Purification Reveals the Condensation of Repressed mRNA Regulons. *Mol Cell*.  
797 2017;68:144-57 e5.

- 798 [49] Jain S, Wheeler JR, Walters RW, Agrawal A, Barsic A, Parker R. ATPase-Modulated Stress  
799 Granules Contain a Diverse Proteome and Substructure. *Cell*. 2016;164:487-98.
- 800 [50] Zhu L, Brangwynne CP. Nuclear bodies: the emerging biophysics of nucleoplasmic phases.  
801 *Curr Opin Cell Biol*. 2015;34:23-30.
- 802 [51] Caudron-Herger M, Rippe K. Nuclear architecture by RNA. *Current opinion in genetics &*  
803 *development*. 2012;22:179-87.
- 804 [52] Erdel F, Rippe K. Formation of Chromatin Subcompartments by Phase Separation.  
805 *Biophysical journal*. 2018;114:2262-70.
- 806 [53] Lee KH, Zhang P, Kim HJ, Mitrea DM, Sarkar M, Freibaum BD, et al. C9orf72 Dipeptide  
807 Repeats Impair the Assembly, Dynamics, and Function of Membrane-Less Organelles. *Cell*.  
808 2016;167:774-88 e17.
- 809 [54] Molliex A, Temirov J, Lee J, Coughlin M, Kanagaraj AP, Kim HJ, et al. Phase separation by  
810 low complexity domains promotes stress granule assembly and drives pathological fibrillization.  
811 *Cell*. 2015;163:123-33.
- 812 [55] Heinrich BS, Maliga Z, Stein DA, Hyman AA, Whelan SPJ. Phase Transitions Drive the  
813 Formation of Vesicular Stomatitis Virus Replication Compartments. *MBio*. 2018;9:02290-17.
- 814 [56] Nikolic J, Le Bars R, Lama Z, Scrima N, Lagaudriere-Gesbert C, Gaudin Y, et al. Negri  
815 bodies are viral factories with properties of liquid organelles. *Nat Commun*. 2017;8:017-00102.
- 816 [57] Heinrich BS, Maliga Z, Stein DA, Hyman AA, Whelan SPJ.
- 817 [58] Hidalgo P, Gonzalez RA.
- 818 [59] McSwiggen DT, Hansen AS, Teves SS, Marie-Nelly H, Hao Y, Heckert AB, et al.
- 819 [60] Nikolic J, Lagaudriere-Gesbert C, Scrima N, Blondel D, Gaudin Y. Structure and Function of  
820 Negri Bodies. *Adv Exp Med Biol*. 2019;1215:111-27.
- 821 [61] Rincheval V, Lelek M, Gault E, Bouillier C, Sitterlin D, Blouquit-Laye S, et al.



- 822 [62] Monette A, Niu M, Chen L, Rao S, Gorelick RJ, Mouland AJ. Pan-retroviral Nucleocapsid-  
823 Mediated Phase Separation Regulates Genomic RNA Positioning and Trafficking. *Cell Rep.*  
824 2020;31:107520.
- 825 [63] Schur FK, Dick RA, Hagen WJ, Vogt VM, Briggs JA. The Structure of Immature Virus-Like  
826 Rous Sarcoma Virus Gag Particles Reveals a Structural Role for the p10 Domain in Assembly.  
827 *J Virol.* 2015;89:10294-302.
- 828 [64] Alberti S, Gladfelter A, Mittag T. Considerations and Challenges in Studying Liquid-Liquid  
829 Phase Separation and Biomolecular Condensates. *Cell.* 2019;176:419-34.
- 830 [65] Cardone G, Purdy JG, Cheng N, Craven RC, Steven AC. Visualization of a missing link in  
831 retrovirus capsid assembly. *Nature.* 2009;457:694-8.
- 832 [66] Fox AH, Bond CS, Lamond AI. P54nrb forms a heterodimer with PSP1 that localizes to  
833 paraspeckles in an RNA-dependent manner. *Mol Biol Cell.* 2005;16:5304-15.
- 834 [67] Mao YS, Sunwoo H, Zhang B, Spector DL. Direct visualization of the co-transcriptional  
835 assembly of a nuclear body by noncoding RNAs. *Nat Cell Biol.* 2011;13:95-101.
- 836 [68] Taslimi A, Vrana JD, Chen D, Borinskaya S, Mayer BJ, Kennedy MJ, et al. An optimized  
837 optogenetic clustering tool for probing protein interaction and function. *Nat Commun.*  
838 2014;5:4925.
- 839 [69] Shin Y, Berry J, Pannucci N, Haataja MP, Toettcher JE, Brangwynne CP. Spatiotemporal  
840 Control of Intracellular Phase Transitions Using Light-Activated optoDroplets. *Cell.*  
841 2017;168:159-71.e14.
- 842 [70] Kim C, Shin Y. An Optogenetic Toolkit for the Control of Phase Separation in Living Cells.  
843 *Methods Mol Biol.* 2023;2563:383-94.
- 844 [71] Park H, Kim NY, Lee S, Kim N, Kim J, Heo WD. Optogenetic protein clustering through  
845 fluorescent protein tagging and extension of CRY2. *Nat Commun.* 2017;8:30.
- 846 [72] Verderame MF, Nelle TD, Wills JW. The membrane-binding domain of the Rous sarcoma  
847 virus Gag protein. *J Virol.* 1996;70:2664-8.

- 848 [73] Maharana S, Wang J, Papadopoulos DK, Richter D, Pozniakovsky A, Poser I, et al. RNA  
849 buffers the phase separation behavior of prion-like RNA binding proteins. *Science*.  
850 2018;360:918-21.
- 851 [74] Kroschwald S, Maharana Shovamayee, Simon Alberti Hexanediol: a chemical probe to  
852 investigate the material properties of membrane-less compartments. *Matters*. 2017.
- 853 [75] Sabari BR, Dall'Agnesse A, Boija A, Klein IA, Coffey EL, Shrinivas K, et al. Coactivator  
854 condensation at super-enhancers links phase separation and gene control. *Science*. 2018;361.
- 855 [76] Yamazaki T, Souquere S, Chujo T, Kobelke S, Chong YS, Fox AH, et al. Functional  
856 Domains of NEAT1 Architectural lncRNA Induce Paraspeckle Assembly through Phase  
857 Separation. *Mol Cell*. 2018;70:1038-53.
- 858 [77] Itoh Y, Iida S, Tamura S, Nagashima R, Shiraki K, Goto T, et al. 1,6-hexanediol rapidly  
859 immobilizes and condenses chromatin in living human cells. *Life Sci Alliance*. 2021;4.
- 860 [78] Liu X, Jiang S, Ma L, Qu J, Zhao L, Zhu X, et al. Time-dependent effect of 1,6-hexanediol  
861 on biomolecular condensates and 3D chromatin organization. *Genome biology*. 2021;22:230.
- 862 [79] Ulianov SV, Velichko AK, Magnitov MD, Luzhin AV, Golov AK, Ovsyannikova N, et al.  
863 Suppression of liquid-liquid phase separation by 1,6-hexanediol partially compromises the 3D  
864 genome organization in living cells. *Nucleic Acids Res*. 2021;49:10524-41.
- 865 [80] Duster R, Kaltheuner IH, Schmitz M, Geyer M. 1,6-Hexanediol, commonly used to dissolve  
866 liquid-liquid phase separated condensates, directly impairs kinase and phosphatase activities. *J*  
867 *Biol Chem*. 2021;296:100260.
- 868 [81] Lopez N, Camporeale G, Salgueiro M, Borkosky SS, Visentin A, Peralta-Martinez R, et al.  
869 Deconstructing virus condensation. *PLoS Pathog*. 2021;17:e1009926.
- 870 [82] Wei W, Bai L, Yan B, Meng W, Wang H, Zhai J, et al. When liquid-liquid phase separation  
871 meets viral infections. *Front Immunol*. 2022;13:985622.
- 872 [83] Etibor TA, Yamauchi Y, Amorim MJ. Liquid Biomolecular Condensates and Viral Lifecycles:  
873 Review and Perspectives. *Viruses*. 2021;13.

- 874 [84] Scoca V, Di Nunzio F. Membraneless organelles restructured and built by pandemic  
875 viruses: HIV-1 and SARS-CoV-2. *J Mol Cell Biol.* 2021;13:259-68.
- 876 [85] Kroschwald S, Alberti S. Gel or Die: Phase Separation as a Survival Strategy. *Cell.*  
877 2017;168:947-8.
- 878 [86] Foffi G, Pastore A, Piazza F, Temussi PA. Macromolecular crowding: chemistry and  
879 physics meet biology (Ascona, Switzerland, 10-14 June 2012). *Physical biology.*  
880 2013;10:040301.
- 881 [87] Wheeler JR, Matheny T, Jain S, Abrisch R, Parker R. Distinct stages in stress granule  
882 assembly and disassembly. *Elife.* 2016;5.
- 883 [88] Dunker AK, Brown CJ, Lawson JD, Iakoucheva LM, Obradovic Z. Intrinsic disorder and  
884 protein function. *Biochemistry.* 2002;41:6573-82.
- 885 [89] Dunker AK, Cortese MS, Romero P, Iakoucheva LM, Uversky VN. Flexible nets. The roles  
886 of intrinsic disorder in protein interaction networks. *The FEBS journal.* 2005;272:5129-48.
- 887 [90] Hsu WL, Oldfield C, Meng J, Huang F, Xue B, Uversky VN, et al. Intrinsic protein disorder  
888 and protein-protein interactions. *Pacific Symposium on Biocomputing Pacific Symposium on*  
889 *Biocomputing.* 2012:116-27.
- 890 [91] Rice BL, Stake MS, Parent LJ. TNPO3-Mediated Nuclear Entry of the Rous Sarcoma Virus  
891 Gag Protein Is Independent of the Cargo-Binding Domain. *J Virol.* 2020;94.
- 892 [92] Dilley KA, Gregory D, Johnson MC, Vogt VM. An LYPSL late domain in the gag protein  
893 contributes to the efficient release and replication of Rous sarcoma virus. *J Virol.* 2010;84:6276-  
894 87.
- 895 [93] Vana ML, Tang Y, Chen A, Medina G, Carter C, Leis J. Role of Nedd4 and ubiquitination of  
896 Rous sarcoma virus Gag in budding of virus-like particles from cells. *J Virol.* 2004;78:13943-53.
- 897 [94] Rye-McCurdy T, Olson ED, Liu S, Binkley C, Reyes JP, Thompson BR, et al. Functional  
898 Equivalence of Retroviral MA Domains in Facilitating Psi RNA Binding Specificity by Gag.  
899 *Viruses.* 2016;8.

- 900 [95] Aronoff R, Hajjar AM, Linial ML. Avian retroviral RNA encapsidation: reexamination of  
901 functional 5' RNA sequences and the role of nucleocapsid Cys-His motifs. *J Virol.* 1993;67:178-  
902 88.
- 903 [96] Dupraz P, Spahr PF. Specificity of Rous sarcoma virus nucleocapsid protein in genomic  
904 RNA packaging. *J Virol.* 1992;66:4662-70.
- 905 [97] Zhou J, Bean RL, Vogt VM, Summers M. Solution structure of the Rous sarcoma virus  
906 nucleocapsid protein: muPsi RNA packaging signal complex. *J Mol Biol.* 2007;365:453-67.
- 907 [98] Morris OM, Torpey JH, Isaacson RL. Intrinsically disordered proteins: modes of binding with  
908 emphasis on disordered domains. *Open biology.* 2021;11:210222.
- 909 [99] Weng J, Wang W. Dynamic multivalent interactions of intrinsically disordered proteins. *Curr*  
910 *Opin Struct Biol.* 2020;62:9-13.
- 911 [100] Arai M, Sugase K, Dyson HJ, Wright PE. Conformational propensities of intrinsically  
912 disordered proteins influence the mechanism of binding and folding. *Proc Natl Acad Sci U S A.*  
913 2015;112:9614-9.
- 914 [101] Berlow RB, Dyson HJ, Wright PE. Multivalency enables unidirectional switch-like  
915 competition between intrinsically disordered proteins. *Proc Natl Acad Sci U S A.* 2022;119.
- 916 [102] Wright PE, Dyson HJ. Intrinsically disordered proteins in cellular signalling and regulation.  
917 *Nat Rev Mol Cell Biol.* 2015;16:18-29.
- 918 [103] Mishra PM, Verma NC, Rao C, Uversky VN, Nandi CK. Intrinsically disordered proteins of  
919 viruses: Involvement in the mechanism of cell regulation and pathogenesis. *Prog Mol Biol Transl*  
920 *Sci.* 2020;174:1-78.
- 921 [104] Dyson HJ, Wright PE. How Do Intrinsically Disordered Viral Proteins Hijack the Cell?  
922 *Biochemistry.* 2018;57:4045-6.
- 923 [105] Wubben JM, Atkinson SC, Borg NA. The Role of Protein Disorder in Nuclear Transport  
924 and in Its Subversion by Viruses. *Cells.* 2020;9.

- 925 [106] Nadaraia-Hoke S, Bann DV, Lochmann TL, Gudleski-O'Regan N, Parent LJ. Alterations in  
926 the MA and NC domains modulate phosphoinositide-dependent plasma membrane localization  
927 of the Rous sarcoma virus Gag protein. *J Virol.* 2013;87:3609-15.
- 928 [107] Aronoff R, Linial M. Specificity of retroviral RNA packaging. *J Virol.* 1991;65:71-80.
- 929 [108] Berkowitz R, Fisher J, Goff SP. RNA packaging. *Curr Top Microbiol Immunol.*  
930 1996;214:177-218.
- 931 [109] Berkowitz RD, Ohagen A, Hoglund S, Goff SP. Retroviral nucleocapsid domains mediate  
932 the specific recognition of genomic viral RNAs by chimeric Gag polyproteins during RNA  
933 packaging in vivo. *J Virol.* 1995;69:6445-56.
- 934 [110] Eckwahl MJ, Telesnitsky A, Wolin SL. Host RNA Packaging by Retroviruses: A Newly  
935 Synthesized Story. *MBio.* 2016;7:e02025-15.
- 936 [111] Gherghe C, Lombo T, Leonard CW, Datta SA, Bess JW, Jr., Gorelick RJ, et al. Definition  
937 of a high-affinity Gag recognition structure mediating packaging of a retroviral RNA genome.  
938 *Proc Natl Acad Sci U S A.* 2010;107:19248-53.
- 939 [112] Campbell S, Vogt VM. In vitro assembly of virus-like particles with Rous sarcoma virus  
940 Gag deletion mutants: identification of the p10 domain as a morphological determinant in the  
941 formation of spherical particles. *J Virol.* 1997;71:4425-35.
- 942 [113] Khanna N, Zhang Y, Lucas JS, Dudko OK, Murre C. Chromosome dynamics near the sol-  
943 gel phase transition dictate the timing of remote genomic interactions. *Nat Commun.*  
944 2019;10:2771.
- 945 [114] Li P, Banjade S, Cheng HC, Kim S, Chen B, Guo L, et al. Phase transitions in the  
946 assembly of multivalent signalling proteins. *Nature.* 2012;483:336-40.
- 947 [115] Peskett TR, Rau F, O'Driscoll J, Patani R, Lowe AR, Saibil HR. A Liquid to Solid Phase  
948 Transition Underlying Pathological Huntingtin Exon1 Aggregation. *Mol Cell.* 2018;70:588-601.
- 949 [116] Lu Y, Lim L, Song J. RRM domain of ALS/FTD-causing FUS characteristic of irreversible  
950 unfolding spontaneously self-assembles into amyloid fibrils. *Sci Rep.* 2017;7:1043.

951 [117] Murray DT, Kato M, Lin Y, Thurber KR, Hung I, McKnight SL, et al. Structure of FUS  
952 Protein Fibrils and Its Relevance to Self-Assembly and Phase Separation of Low-Complexity  
953 Domains. *Cell*. 2017;171:615-27.e16.

954 [118] Lin Y, Protter DS, Rosen MK, Parker R. Formation and Maturation of Phase-Separated  
955 Liquid Droplets by RNA-Binding Proteins. *Mol Cell*. 2015;60:208-19.

956 [119] Gibson DG, Young L, Chuang RY, Venter JC, Hutchison CA, 3rd, Smith HO. Enzymatic  
957 assembly of DNA molecules up to several hundred kilobases. *Nat Methods*. 2009;6:343-5.

958 [120] Sun Z, Diaz Z, Fang X, Hart MP, Chesi A, Shorter J, et al. Molecular determinants and  
959 genetic modifiers of aggregation and toxicity for the ALS disease protein FUS/TLS. *PLoS Biol*.  
960 2011;9:e1000614.

961 [121] Purdy JG, Flanagan JM, Ropson IJ, Rennoll-Bankert KE, Craven RC. Critical role of  
962 conserved hydrophobic residues within the major homology region in mature retroviral capsid  
963 assembly. *J Virol*. 2008;82:5951-61.

964 [122] Moscovici C, Moscovici MG, Jimenez H, Lai MM, Hayman MJ, Vogt PK. Continuous tissue  
965 culture cell lines derived from chemically induced tumors of Japanese quail. *Cell*. 1977;11:95-  
966 103.

967 [123] Craven RC, Leure-duPree AE, Weldon RA, Jr., Wills JW. Genetic analysis of the major  
968 homology region of the Rous sarcoma virus Gag protein. *J Virol*. 1995;69:4213-27.

969 [124] Craven RC, Leure-duPree AE, Erdie CR, Wilson CB, Wills JW. Necessity of the spacer  
970 peptide between CA and NC in the Rous sarcoma virus gag protein. *J Virol*. 1993;67:6246-52.

971 [125] Grimm JB, English BP, Chen J, Slaughter JP, Zhang Z, Revyakin A, et al. A general  
972 method to improve fluorophores for live-cell and single-molecule microscopy. *Nat Methods*.  
973 2015;12:244-50, 3 p following 50.

974 [126] Matic I, van Hagen M, Schimmel J, Macek B, Ogg SC, Tatham MH, et al. In vivo  
975 identification of human small ubiquitin-like modifier polymerization sites by high accuracy mass  
976 spectrometry and an in vitro to in vivo strategy. *Mol Cell Proteomics*. 2008;7:132-44.

977 [127] Boehning M, Dugast-Darzacq C, Rankovic M, Hansen AS, Yu T, Marie-Nelly H, et al. RNA  
978 polymerase II clustering through carboxy-terminal domain phase separation. Nat Struct Mol Biol.  
979 2018;25:833-40.

980 [128] Koulouras G, Panagopoulos A, Rapsomaniki MA, Giakoumakis NN, Taraviras S, Lygerou  
981 Z. EasyFRAP-web: a web-based tool for the analysis of fluorescence recovery after  
982 photobleaching data. Nucleic Acids Res. 2018;46:W467-W72.

983  
984  
985  
986  
987  
988

989 **Figure Legends**

990 **Table 1: FRAP mobile fraction and  $t_{1/2}$  (sec) analysis of WT Gag in the nucleus,**  
991 **cytoplasm, and at the plasma membrane.**

992 **Table 2: FRAP mobile fraction and  $t_{1/2}$  analysis of YFP-PSP1 and nuclear restricted Gag.**

993 **Table 3: FRAP mobile fraction comparison of WT and mutant Gag proteins.**

994 **Table 4: FRAP  $t_{1/2}$  (sec) comparison of WT and mutant Gag proteins.**



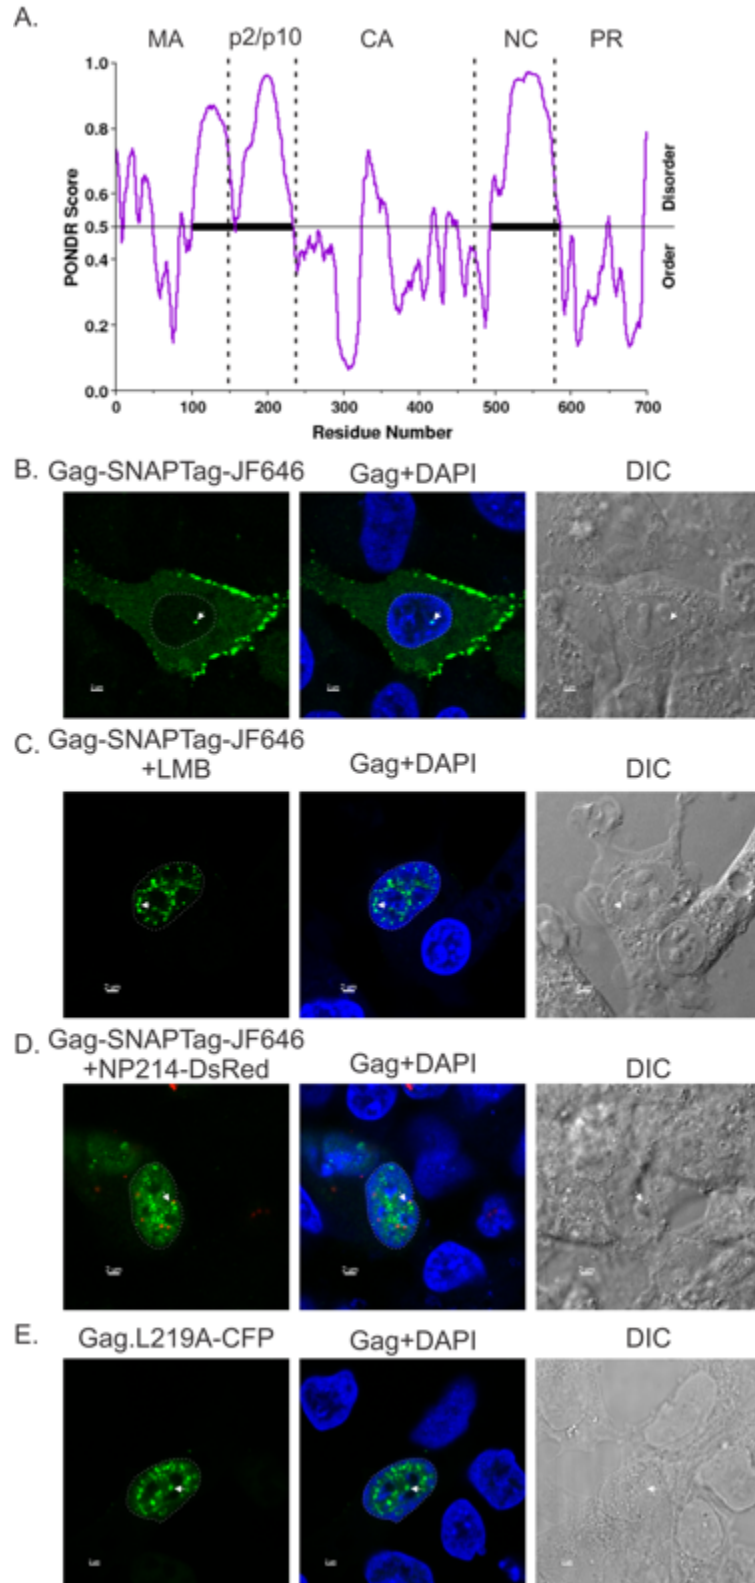

995

996

997

**Figure 1: RSV Gag contains intrinsically disordered regions (IDRs) and forms BMCs in cells.** (A) PONDRA analysis of RSV reveals two IDRs, one spanning Map2p10 and the other

998 within NC. (B) Wild-type Gag-SNAPTag labeled with JF646 SNAP ligand (green) formed foci  
999 along the plasma membrane, in the cytoplasm, and in the nucleus (DAPI, blue; nucleus, white  
1000 outline). The same phenomenon can be viewed when WT Gag-SNAP-tag JF646 was trapped in  
1001 the nucleus either by (C) CRM1 inhibition by leptomycin B (LMB) or (D) a dominant-negative of  
1002 Nup214 (NP214-DsRed). (E) The Gag.L219A-CFP (green) nuclear export mutant formed  
1003 phase-contrasted nuclear foci that can be viewed using DIC, a known characteristic of BMCs.  
1004 Scale bar = 2  $\mu$ m.  
1005

1006

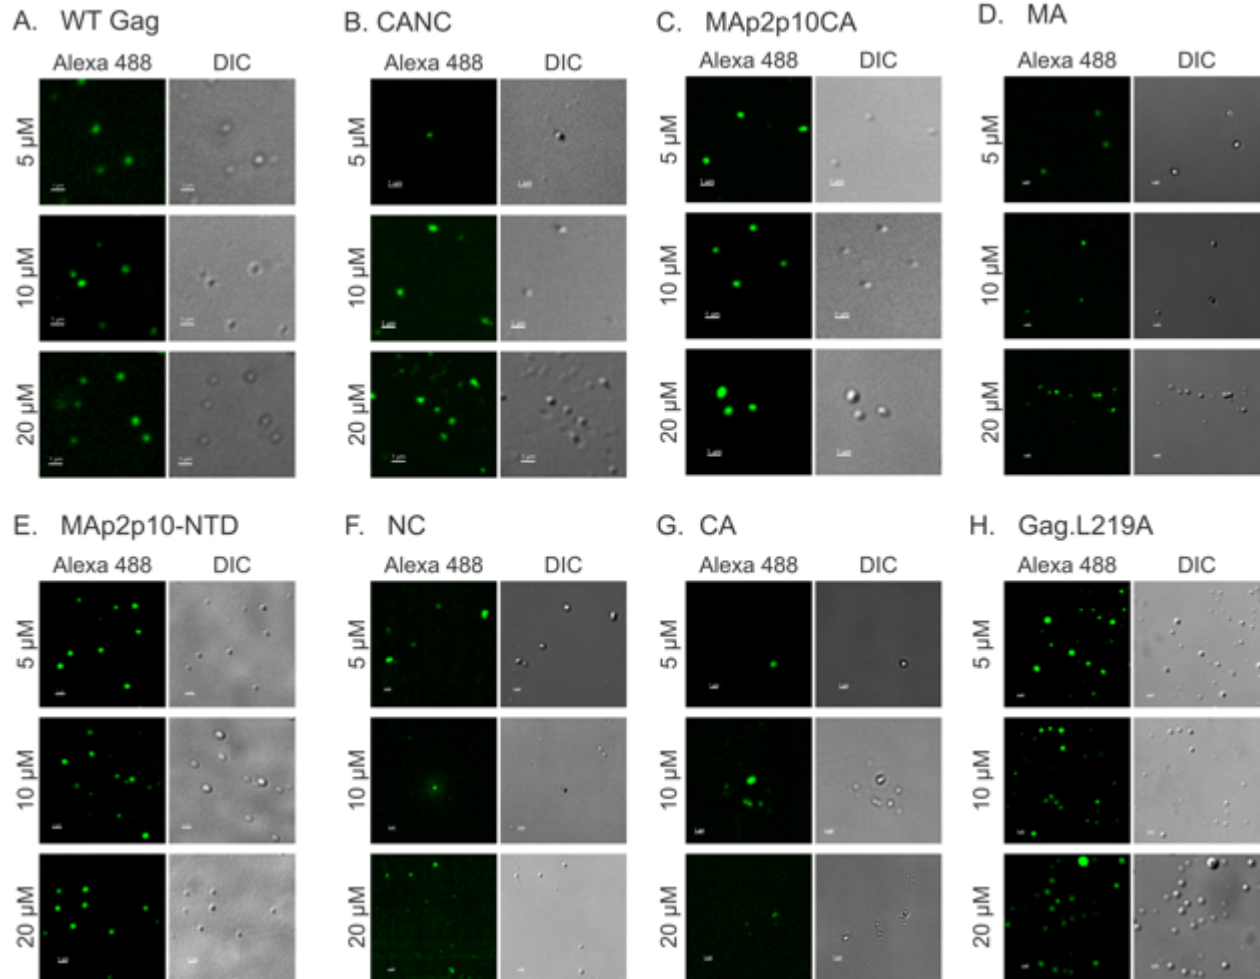

1007

1008 **Figure 2: Full-length and mutant purified RSV Gag proteins form *in vitro* droplets.** Purified

1009 proteins were labeled with Alexa Fluor 488 and imaged via confocal microscopy at 7x zoom.

1010 Protein concentration is indicated to the left. All proteins formed droplets under these conditions,

1011 to varying degrees. Scale bar= 1  $\mu$ m. DIC was relied upon for visualization and analysis of NC

1012 and CA complexes due to inefficient labeling with Alexa Fluor dye (see Methods).

1013

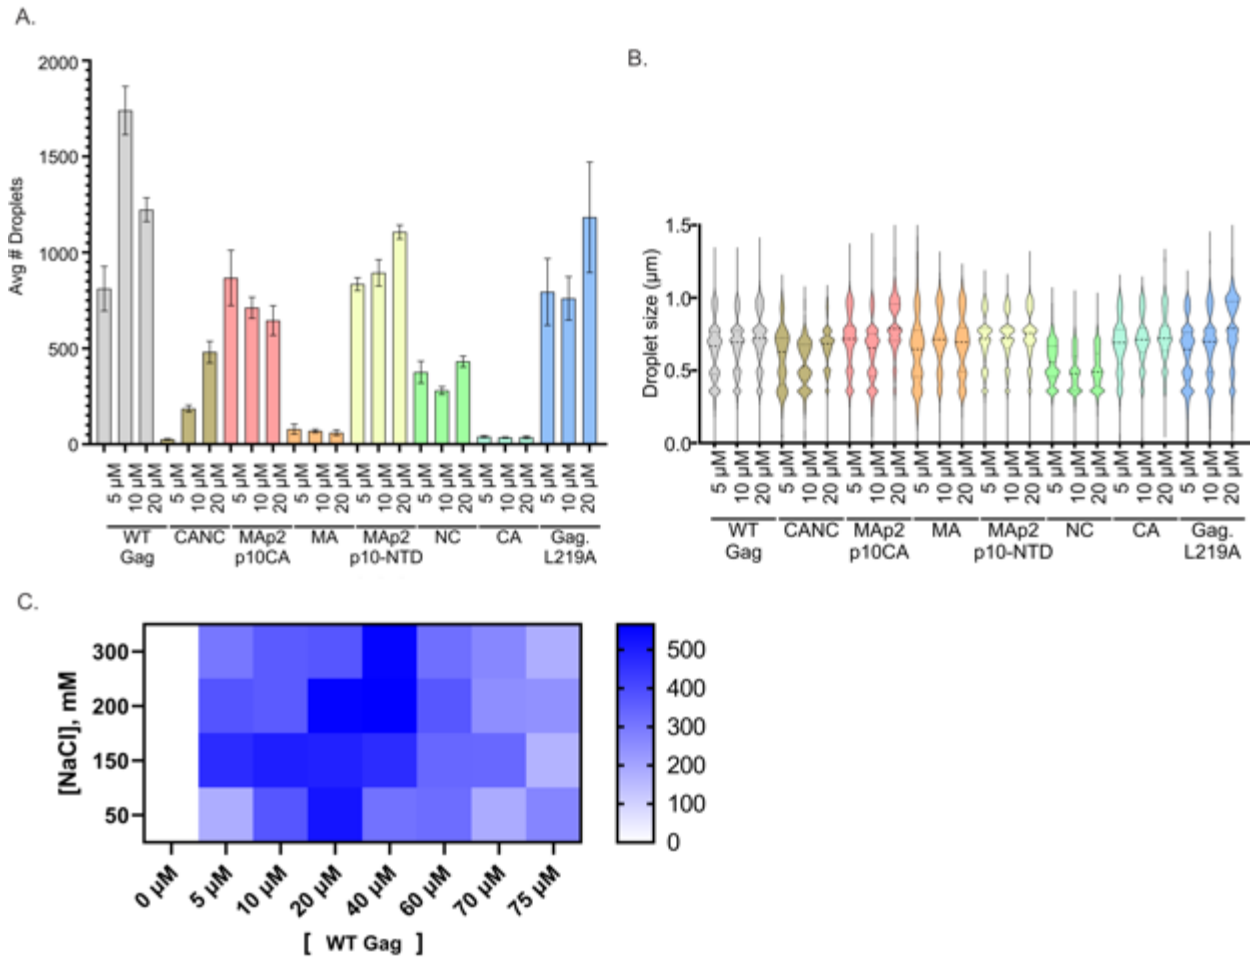

1014

1015 **Figure 3: Analysis of *in vitro* droplet size, number, and protein/salt concentrations**

1016 **required for droplet formation.** (A) and (B) 10 low magnification fields were captured for each

1017 protein and concentration. The Imaris spot function was used to count the number of droplets

1018 and estimate the diameter of each droplet. Non-spherical droplets and those at the edge of the

1019 field were excluded so as not to skew the diameter measurement. Fluorescent images were

1020 subjected to Gaussian filtering to remove background fluorescence. The fluorescence channel

1021 of all proteins was utilized for analysis with the exception of NC and CA, due to inefficient

1022 fluorescent labeling (see Methods). For most proteins, the average number of droplets per field

1023 varied for each concentration (A). A violin plot was used to display the distribution of droplet

1024 sizes for each condition (B). To determine the optimal conditions for *in vitro* droplet formation for

1025 WT Gag, a phase diagram was generated by comparing various protein and NaCl

1026 concentrations and counting the number of droplets present under each condition (C). The  
1027 protein was unlabeled, and droplets visualized by DIC were counted using the Imaris spot  
1028 function. White indicated zero droplets, with increasingly darker shades of blue representing the  
1029 indicated number of droplets averaged from  $\geq 5$  fields per condition. Based upon this analysis,  
1030 NaCl concentration of 150 nM and Gag concentration of 10  $\mu\text{M}$  to 20  $\mu\text{M}$  appeared to provide  
1031 the optimal conditions for *in vitro* droplet formation.

1032

A. WT Gag

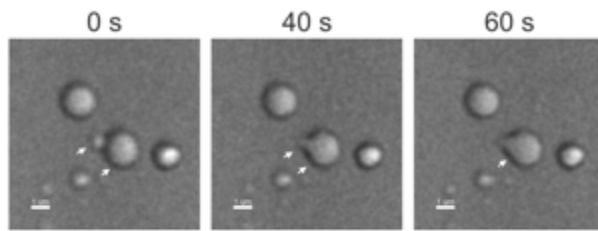

B. Gag.L219A

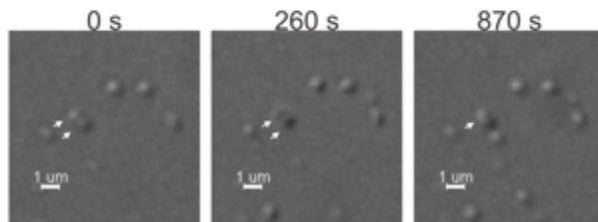

1033

1034

1035

1036

1037

1038

1039

**Figure 4: *In vitro* droplet fusion.** 20  $\mu$ M of unlabeled protein complexes composed of either WT Gag or Gag.L219A were imaged immediately after mixing. Complexes were imaged every 10 seconds under either bright field (WT) or DIC (Gag.L219A). (A) A small Gag droplet was seen fusing with a larger droplet (designated by white arrows) over time. (B) Two small Gag.L219A droplets (white arrows) fused into a single droplet over time. Scale bar= 1  $\mu$ m.

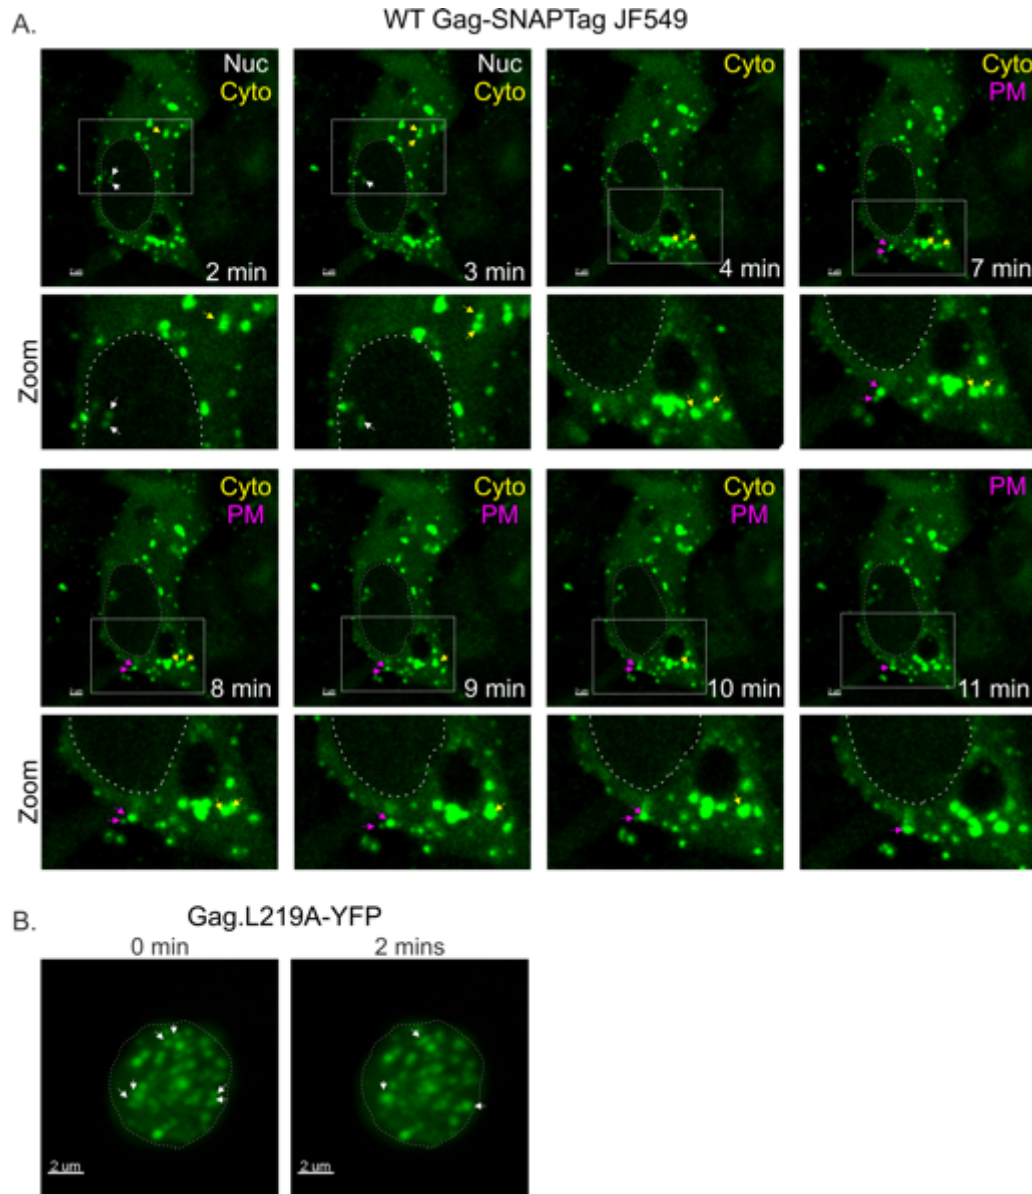

1040

1041 **Figure 5: *In vivo* droplet fusion and fission of WT Gag and Gag.L219A.** One characteristic  
1042 of BMCs is that they are dynamic and can undergo fusion or fission over time. (A) Using a single  
1043 confocal z-plane, live-cell timelapse imaging was conducted (1 frame/minute) in a QT6 cell  
1044 expressing WT Gag-SNAP-tag bound to SNAP-ligand conjugated to JF549. The nucleus was  
1045 outlined in a white dashed line. Several WT Gag-SNAP-tag foci were observed to undergo  
1046 fusion or fission in different cellular compartments: nucleus (foci indicated by white arrows),  
1047 cytoplasm (yellow arrows), and at the plasma membrane (magenta arrows). Droplets of interest

1048 were also displayed at higher magnification (inset). See also Supplemental Movies 3a, 3b, and  
1049 3c for timelapse images. (B) A single optical Z-plane of a QT6 cell expressing the Gag.L219A-  
1050 YFP nuclear export mutant was imaged using confocal timelapse microscopy at one frame  
1051 every minute. Over a period of two minutes, three different pairs of droplets underwent fusion.  
1052 The nucleus is outlined with a white dotted-line. Scale bar= 2  $\mu$ m. See also Supplemental Movie  
1053 4 for timelapse images.  
1054



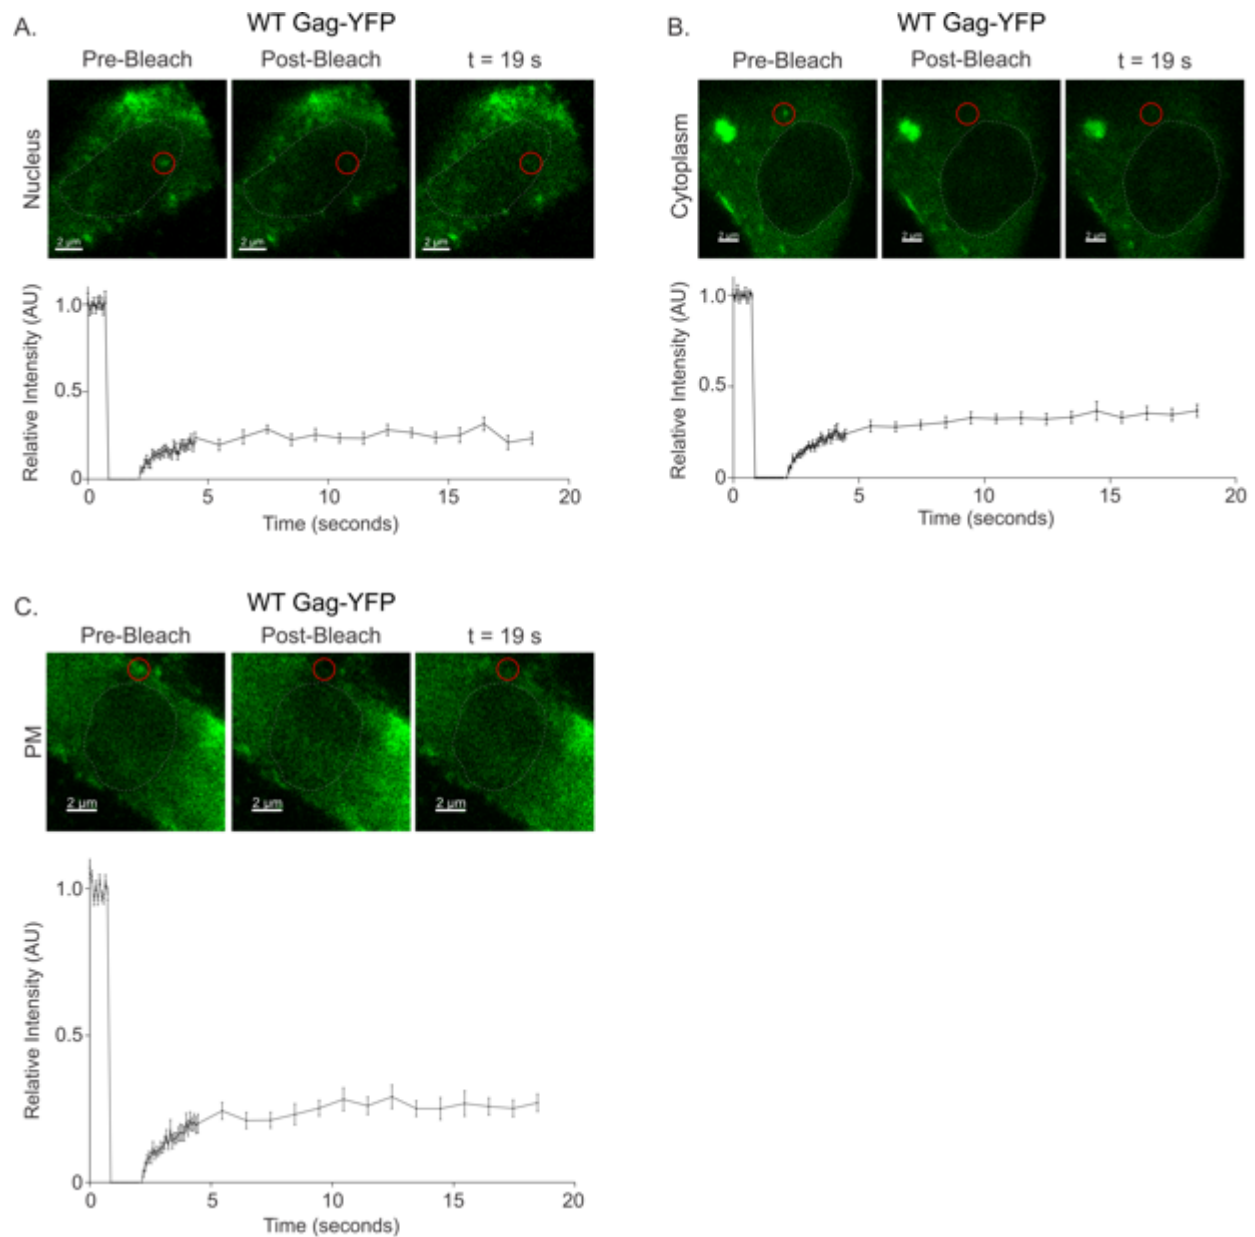

1055

1056 **Figure 6: FRAP analysis of WT Gag foci in the nucleus, cytoplasm, and at the plasma**

1057 **membrane.** WT RU5.Gag-YFP foci (red circles) were photobleached and the half-time ( $t_{1/2}$ ) and

1058 fraction of recovery was measured for approximately 19 seconds. (A) Nuclear foci (N=14), (B)

1059 cytoplasmic foci (N=18), (C) plasma membrane foci (N=17) were analyzed. The graphs show

1060 the average recovery graph with error bars for the indicated number of foci. Scale bar= 2 μm.

1061 The nucleus was outlined in a white dashed line. See also Tables 1, 3, and 4 for quantification

1062 and statistical analysis.

1063

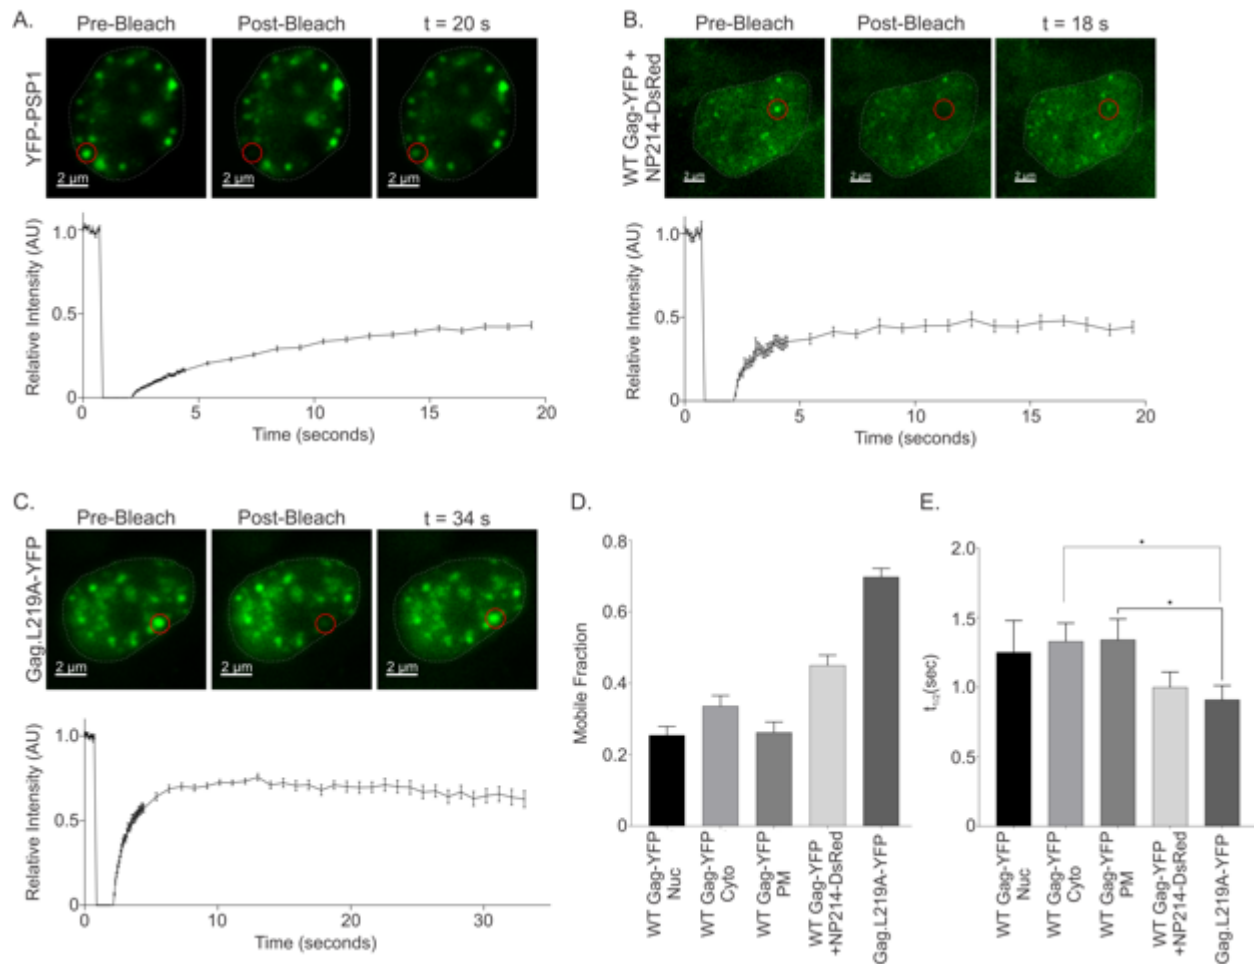

1064

1065 **Figure 7: FRAP analysis of PSP1 and nuclear restricted Gag foci.** (A) YFP-PSP1 (N=23), a  
 1066 paraspeckle protein, served as a control for the FRAP experiments. (B) To block WT Gag  
 1067 nuclear export and increase the nuclear concentration of Gag protein, a dominant negative  
 1068 nucleoporin Nup214 (NP214-DsRed) was co-expressed with WT RU5.Gag-YFP (N=15). (C)  
 1069 The nuclear export mutant RU5.Gag.L219A-YFP (N=20) formed bright nuclear complexes that  
 1070 recovered quickly. Scale bar= 2 μm. (D) and (E) Graphs presenting the average mobile fraction  
 1071 and  $t_{1/2}$  (sec) comparisons for each Gag condition. The nuclear Gag foci formed with NP214 co-  
 1072 expression or Gag.L219A foci recovered with a significantly shorter  $t_{1/2}$  and higher mobile  
 1073 fraction compared to WT Gag foci shown in Figure 6. See also Tables 2, 3, and 4 for  
 1074 quantification and statistical analysis.

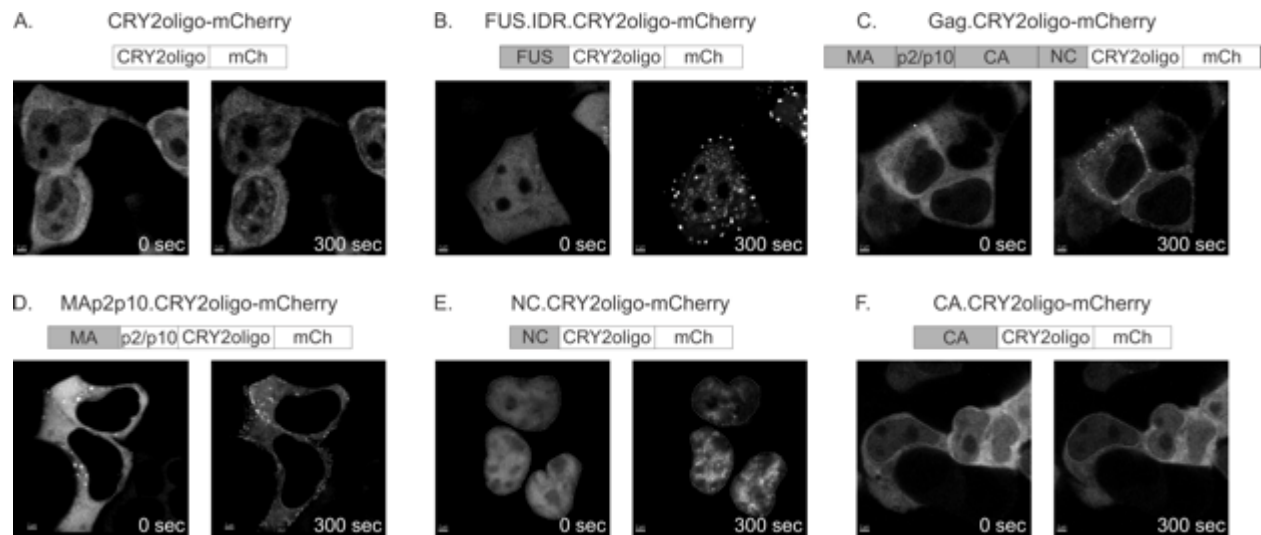

1075

1076

1077

1078

1079

1080

1081

1082

1083

1084

1085

1086

1087

**Figure 8: OptoDroplet Assay of Gag IDRs.** To determine whether either WT Gag or individual domains of Gag could form condensates in living cells, they were fused to CRY2oligo, which induces droplet formation when illuminated with blue light, and mCherry to allow for fusion protein visualization. Living HEK293T cells expressing the indicated constructs were imaged every 5 seconds for 300 seconds. Blue light illumination occurred 30 seconds into the time course. A) CRY2oligo-mCherry formed minimal clusters with blue light illumination. B) FUS.IDR.CRY2oligo-mCherry had strong clustering with blue light. C) Gag.CRY2oligo-mCherry and D) MAp2p10.CRY2oligo-mCherry formed plasma membrane localized condensates. E) NC.CRY2oligo-mCherry formed numerous nuclear droplets. F) CA.CRY2oligo-mCherry, which does not contain an IDR, did not cluster with blue light illumination. Scale bar= 2 μm. Nuclei were outline by white dashed lines. See also Supplemental Movies 5, 6, 7, 8, 9, and 10.

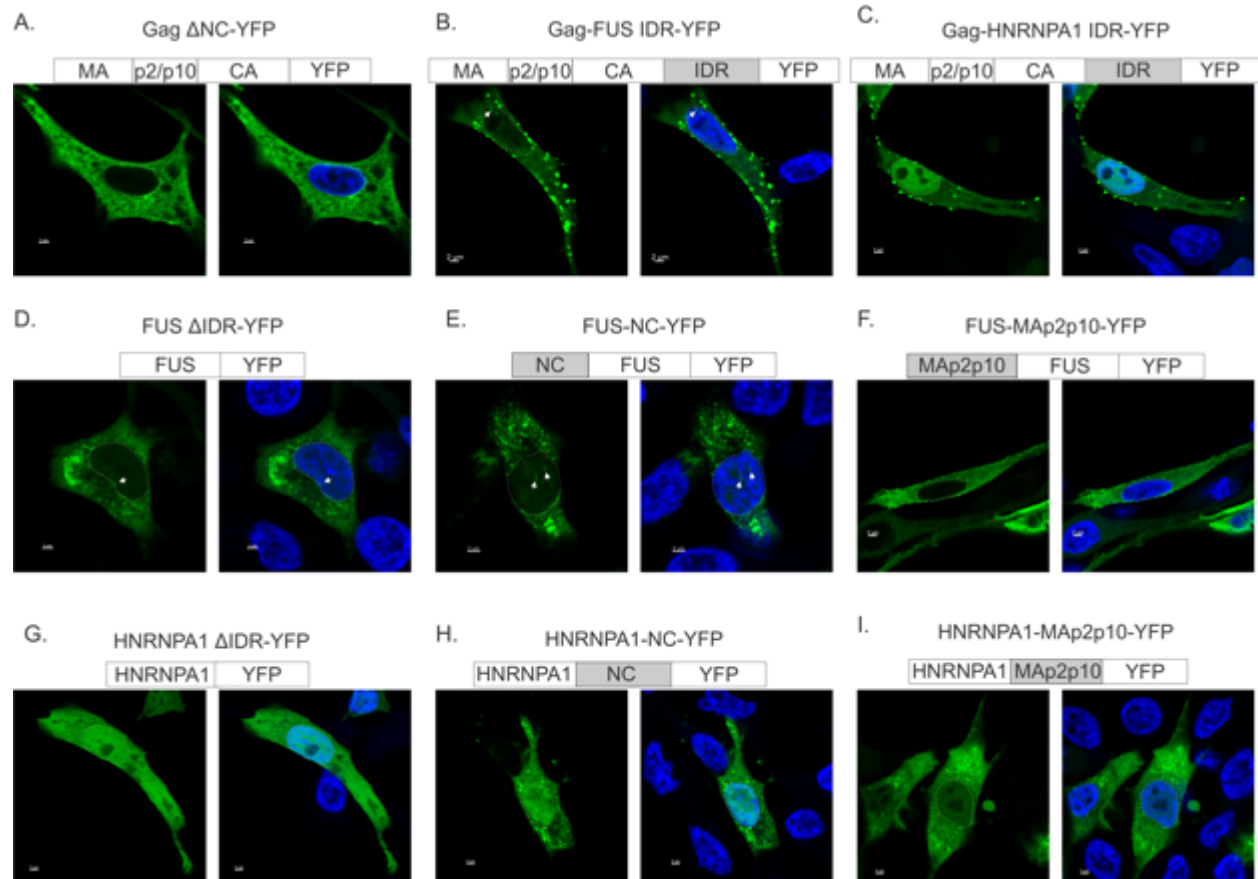

1088

1089

1090

1091

1092

1093

1094

1095

1096

1097

1098

1099

1100

**Figure 9: Chimeras of Gag and cellular protein IDRs.** To determine whether the putative IDRs from either Gag or cellular proteins with well-characterized IDRs (FUS and HNRNPA1) could rescue the ability of mutants lacking IDRs to form droplets, chimeras were created.

Schematic diagrams of the chimeras were placed above the microscopic images with IDRs shaded gray. Representative confocal microscopy images were shown for each construct. (A) In the absence of the NC domain (Gag  $\Delta$ NC-YFP), Gag remained diffuse in the cytoplasm and lost the ability to form foci. (B) Replacing the NC sequence with the FUS IDR allowed Gag to form foci once again (RU5.Gag-Fus IDR-YFP) in the nucleus and at the plasma membrane. (C) Replacing the NC region with the HNRNPA1 IDR restored Gag's ability to form discrete plasma membrane foci and the chimera was more strongly localized to the nucleus (RU5.Gag-HNRNPA1 IDR-YFP). (D) In the absence of the IDR, FUS was primarily diffuse but formed some aggregates. White arrows point out nuclear foci in (D) and (E). Replacing the FUS IDR

1101 with the NC IDR led to increased formation of foci in the cytoplasm and in the nucleus (FUS-NC-  
1102 YFP). (F) Replacing the FUS IDR with MAp2p10 resulted in the formation of foci that localized  
1103 primarily to the plasma membrane (FUS-MAp2p10-YFP). (G) In the absence of its IDR,  
1104 HNRNPA1 was diffuse throughout the entire cell. (H) Replacing the HNRNPA1 IDR with NC  
1105 induced the formation of cytoplasmic foci (HNRNPA1-NC-YFP). (I) Exchanging the HNRNPA1  
1106 IDR with MAp2p10 (HNRNPA1-MAp2p10-YFP) led to the formation of cytoplasmic foci with less  
1107 targeting to the nucleus compared with the HNRNPA1-NC chimera. Nuclei were outlined in  
1108 white dashed lines. Scale bar= 2  $\mu$ m.  
1109

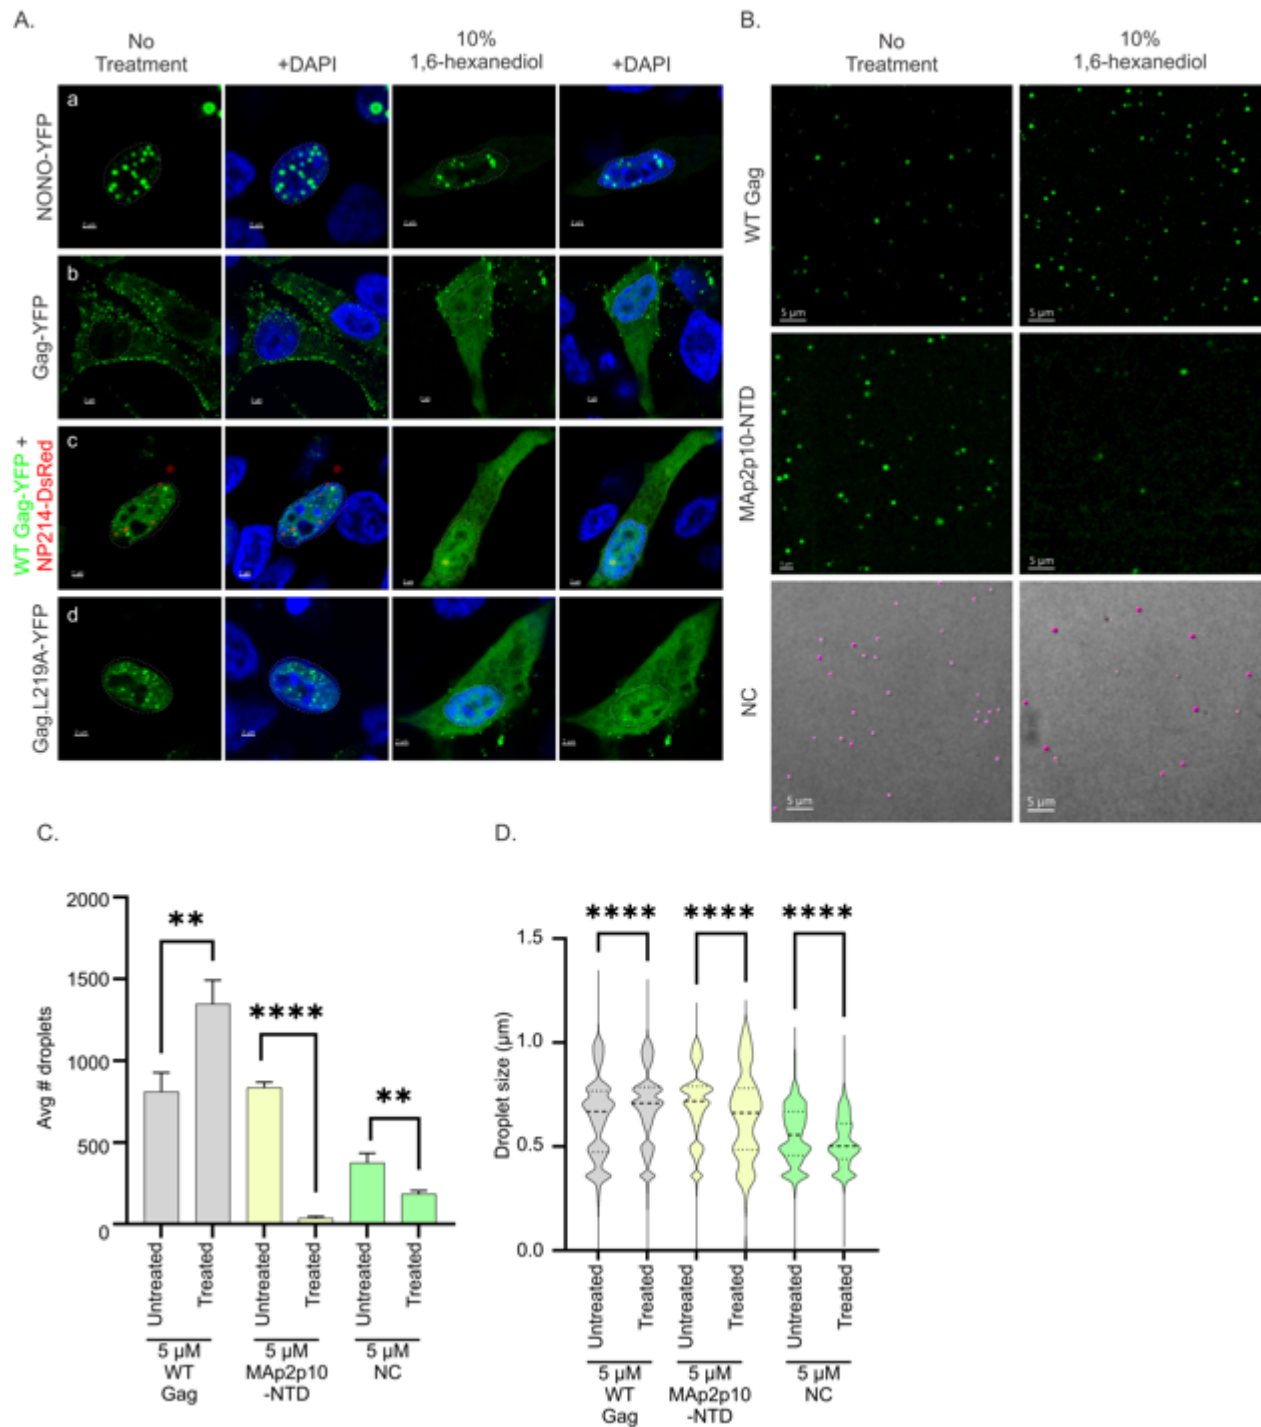

1110

1111 **Figure 10: *In vivo* and *in vitro* perturbation of BMCs with 1,6-hexanediol.** A characteristic  
 1112 of BMCs is disruption by 1,6-hexanediol. QT6 cells expressing the indicated constructs (A) were  
 1113 incubated with 10% 1,6-hexanediol for 1 minute and *in vitro* droplets (B) were treated for 10  
 1114 minutes. (A) panel a. NONO-YFP foci were disrupted by 1,6-hexanediol to a minor degree in

1115 QT6 cells. Panels b, c, and d. WT RU5.Gag-YFP and nuclear-restricted Gag foci became  
1116 diffuse throughout the entire cell following treatment, indicating that Gag foci were sensitive to  
1117 disruption in all cellular compartments. Scale bar= 2  $\mu$ m. (B) The effect of 1,6-hexanediol on *in*  
1118 *vitro* droplets was observed on recombinant WT Gag, MAp2p10-NTD, and NC proteins. 1,6-  
1119 hexanediol (10%) was mixed with 5  $\mu$ M of each protein in the presence of Ficoll-400 and NaCl,  
1120 then incubated for 10 minutes before imaging. For better display of the NC droplets visualized  
1121 using DIC, the image was overlaid with spheres generated by the spot function in Imaris  
1122 (magenta). Scale bar= 5  $\mu$ m. (C) and (D) 10 low-magnification fields were collected for each  
1123 condition and subjected to the Imaris spot function to measure the number and size of droplets.  
1124 In all cases, 1,6-hexanediol treatment induced statistically significant changes.  
1125

1126

1127 **Supplemental Figure Legends:**

1128 **Supplemental Table 1: *in vitro* droplet size comparison.**

1129 **Supplemental Table 2: *in vitro* droplet number comparison.**

1130 **Supplemental Movie 1:** To determine whether WT Gag droplets formed *in vitro* had liquid-like  
1131 properties, 20  $\mu\text{M}$  of unlabeled WT Gag protein mixed with crowding agent was imaged under  
1132 brightfield every 10 seconds. A small droplet is seen fusing into a large droplet (black circle).  
1133 Scale bar = 1  $\mu\text{m}$ .

1134 **Supplemental Movie 2:** To determine whether Gag.L219A *in vitro* droplets had liquid-like  
1135 properties, 20  $\mu\text{M}$  of unlabeled protein mixed with crowding agent was imaged by DIC every 10  
1136 seconds. Several examples of droplet fusion are outlined in black circles. Scale bar = 1  $\mu\text{m}$ .

1137 **Supplemental Movies 3a, 3b, and 3c: WT Gag *in vivo* fusion.** To examine fusion and fission  
1138 of WT Gag in different subcellular compartments, a living QT6 cell expressing Gag-SNAPtag  
1139 was imaged at 1 frame/minute. For better visualization of the foci in each subcellular  
1140 compartment, images were adjusted in Imaris for the (a) nucleus, (b) cytoplasm, and (c) plasma  
1141 membrane. Foci of interest in each movie were circled in white (nucleus), yellow (cytoplasm), or  
1142 magenta (plasma membrane). Scale bar= 1  $\mu\text{m}$ .

1143 **Supplemental Movie 4: Nuclear restricted Gag *in vivo* fusion.** QT6 cells expressing the  
1144 Gag.L219A-YFP NES mutant were imaged at 1 frame/minute. Several examples of fusing  
1145 droplets were outlined in black circles. Scale bar= 1  $\mu\text{m}$ .

1146 **Supplemental Movie 5: CRY2oligo-mCherry time course.** HEK293T cells expressing  
1147 CRY2oligo-mCherry were imaged every 5 seconds for 300 seconds. At 30 seconds, cluster  
1148 formation was induced by the addition of blue light. CRY2oligo-mCherry formed few clusters.  
1149 Scale bar = 2  $\mu\text{m}$ .

1150 **Supplemental Movie 6: FUS.IDR.CRY2oligo-mCherry time course.** Cells were imaged every  
1151 5 seconds for 300 seconds to detect mCherry fluorescence. FUS.IDR.CRY2oligo-mCherry



1152 underwent marked clustering in HEK293T cells when illuminated with blue light at 30 seconds.

1153 Scale bar = 2  $\mu$ m.

1154 **Supplemental Movie 7: Gag.CRY2oligo-mCherry time course.** HEK293T cells expressing

1155 Gag.CRY2oligo-mCherry were imaged every 5 seconds for 300 seconds to detect mCherry

1156 fluorescence. Cells were illuminated with blue light after 30 seconds of imaging, inducing the

1157 Gag.CRY2oligo-mCherry protein to form clusters at the plasma membrane. Scale bar = 2  $\mu$ m.

1158 **Supplemental Movie 8: MAp2p10.CRY2oligo-mCherry time course.** HEK293T cells

1159 expressing MAp2p10.CRY2oligo-mCherry were imaged every 5 seconds for 300 seconds to

1160 detect mCherry fluorescence. Although a few cytoplasmic foci are observed in the absence of

1161 blue light, illumination of the cells with blue light at 30 seconds caused MAp2p10.CRY2oligo-

1162 mCherry to cluster at the plasma membrane in HEK293T cells. Scale bar = 2  $\mu$ m.

1163 **Supplemental Movie 9: NC.CRY2oligo-mCherry time course.** When illuminated with blue

1164 light, NC.CRY2oligo-mCherry formed numerous clusters in the nuclei of HEK293T cells. Cells

1165 were imaged every 5 seconds for 300 seconds to detect mCherry fluorescence. Blue light was

1166 added 30 seconds into imaging session. Scale bar = 2  $\mu$ m.

1167 **Supplemental Movie 10: CA.CRY2oligo-mCherry time course.** The CA sequence does not

1168 contain a predicted IDR. When HEK293T cells expressing CA.CRY2oligo-mCherry were

1169 stimulated with blue light, the protein did not form clusters. Cells were imaged every 5 seconds

1170 for 300 seconds. Blue light was added after 30 seconds of imaging. Scale bar = 2  $\mu$ m.

1171

**Table 1: FRAP analysis of WT Gag-YFP**

|                              | <b>WT Gag-YFP<br/>Nuc</b> | <b>WT Gag-YFP<br/>Cyto</b> | <b>WT Gag-YFP<br/>PM</b> |
|------------------------------|---------------------------|----------------------------|--------------------------|
| <b># of cells</b>            | 14                        | 18                         | 17                       |
| <b>Mobile<br/>Fraction</b>   | 0.25 ± 0.02               | 0.33 ± 0.029               | 0.26 ± 0.029             |
| <b>T<sub>1/2</sub> (sec)</b> | 1.25 ± 0.22               | 1.33 ± 0.13                | 1.34 ± 0.14              |

1172

1173

| <b>Table 2: FRAP analysis of YFP-PSP1 and Nuclear restricted Gag</b> |                 |                                 |                      |
|----------------------------------------------------------------------|-----------------|---------------------------------|----------------------|
|                                                                      | <b>YFP-PSP1</b> | <b>WT Gag-YFP + NP214-DsRed</b> | <b>Gag.L219A-YFP</b> |
| <b># of cells</b>                                                    | 23              | 15                              | 20                   |
| <b>Mobile Fraction</b>                                               | 0.45 ± 0.01     | 0.45 ± 0.02                     | 0.69 ± 0.02          |
| <b>T<sub>1/2</sub> (sec)</b>                                         | 4.49 ± 0.24     | 1.00 ± 0.10                     | 0.91 ± 0.10          |

1174

1175

1176

| <b>Table 3: Mobile Fraction Comparison</b> |              |                       |                        |                      |                                 |
|--------------------------------------------|--------------|-----------------------|------------------------|----------------------|---------------------------------|
|                                            | <b>Means</b> | <b>WT Gag-YFP Nuc</b> | <b>WT Gag-YFP Cyto</b> | <b>WT Gag-YFP PM</b> | <b>WT Gag-YFP + NP214-DsRed</b> |
| <b>WT Gag-YFP Nuc</b>                      | 0.25 ± 0.02  |                       |                        |                      |                                 |
| <b>WT Gag-YFP Cyto</b>                     | 0.33 ± 0.029 | *<br>0.0473           |                        |                      |                                 |
| <b>WT Gag-YFP PM</b>                       | 0.26 ± 0.029 |                       |                        |                      |                                 |
| <b>WT Gag-YFP + NP214-DsRed</b>            | 0.45 ± 0.02  | ****<br><0.0001       | **<br>0.0093           | ****<br><0.0001      |                                 |
| <b>Gag.L219A-YFP</b>                       | 0.69 ± 0.02  | ****<br><0.0001       | ****<br><0.0001        | ****<br><0.0001      | ****<br><0.0001                 |

1177  
1178  
1179

Unless indicated by \*, the comparisons were not statistically significant

| <b>Table 4: <math>t_{1/2}</math> Comparison</b> |                     |                       |                        |                      |                                 |
|-------------------------------------------------|---------------------|-----------------------|------------------------|----------------------|---------------------------------|
|                                                 | <b>Means</b>        | <b>WT Gag-YFP Nuc</b> | <b>WT Gag-YFP Cyto</b> | <b>WT Gag-YFP PM</b> | <b>WT Gag-YFP + NP214-DsRed</b> |
| <b>WT Gag-YFP Nuc</b>                           | 1.25 ± 0.22<br>secs |                       |                        |                      |                                 |
| <b>WT Gag-YFP Cyto</b>                          | 1.33 ± 0.13<br>secs |                       |                        |                      |                                 |
| <b>WT Gag-YFP PM</b>                            | 1.34 ± 0.14<br>secs |                       |                        |                      |                                 |
| <b>WT Gag-YFP + NP214-DsRed</b>                 | 1.00 ± 0.10<br>secs |                       |                        |                      |                                 |
| <b>Gag.L219A-YFP</b>                            | 0.91 ± 0.10<br>secs |                       | *<br>0.0149            | *<br>0.0190          |                                 |

1180 Unless indicated by \*, the comparisons were not statistically significant
